# 1 Mutations that adapt SARS-CoV-2 to 2 mustelid hosts do not increase fitness in 3 the human airway.

4 Author list: Jie Zhou<sup>1#</sup>, Thomas P. Peacock<sup>1#</sup>, Jonathan C. Brown<sup>1#</sup>, Daniel H. Goldhill<sup>1#</sup>, Ahmed M.E.  
5 Elrefaey<sup>2</sup>, Rebekah Penrice-Randal<sup>3</sup>, Vanessa M. Cowton<sup>4</sup>, Giuditta De Lorenzo<sup>4</sup>, Wilhelm Furnon<sup>4</sup>,  
6 William T. Harvey<sup>4</sup>, Ruthiran Kugathasan<sup>1</sup>, Rebecca Frise<sup>1</sup>, Laury Baillon<sup>1</sup>, Ria Lassaunière<sup>5</sup>, Nazia  
7 Thakur<sup>2,6</sup>, Giulia Gallo<sup>2</sup>, Hannah Goldswain<sup>3</sup>, I'ah Donovan-Banfield<sup>3</sup>, Xiaofeng Dong<sup>3</sup>, Nadine P.  
8 Randle<sup>3</sup>, Fiachra Sweeney<sup>1</sup>, Martha C. Glynn<sup>1</sup>, Jessica L. Quantrill<sup>1</sup>, Paul F. McKay<sup>1</sup>, Arvind H. Patel<sup>4</sup>,  
9 Massimo Palmarini<sup>4</sup>, Julian A. Hiscox<sup>3,7</sup>, Dalan Bailey<sup>2</sup>, and Wendy S. Barclay<sup>1</sup>

10 <sup>1</sup>Department of Infectious Disease, Imperial College London, UK.

11 <sup>2</sup>The Pirbright Institute, Woking, Surrey, UK.

12 <sup>3</sup>Institute of Infection, Veterinary and Ecology Sciences, University of Liverpool, UK.

13 <sup>4</sup>MRC-University of Glasgow Centre for Virus Research, Glasgow, UK

14 <sup>5</sup>Virus & Microbiological Special Diagnostics, Statens Serum Institut, Copenhagen, Denmark.

15 <sup>6</sup>The Jenner Institute, Nuffield Department of Medicine, University of Oxford, UK

16 <sup>7</sup>Infectious Diseases Horizontal Technology Centre (ID HTC), A\*STAR, Singapore.

17 <sup>#</sup>These authors contributed equally to this study.

18 \*corresponding author – [w.barclay@imperial.ac.uk](mailto:w.barclay@imperial.ac.uk)

19 Keywords: SARS-CoV-2; COVID-19; coronavirus; mink; ferret; antigenicity; ACE2

20

## 21 **Abstract**

22 SARS-CoV-2 has a broad mammalian species tropism infecting humans, cats, dogs and farmed  
23 mink. Since the start of the 2019 pandemic several reverse zoonotic outbreaks of SARS-CoV-2 have  
24 occurred in mink, one of which reinfected humans and caused a cluster of infections in Denmark. Here  
25 we investigate the molecular basis of mink and ferret adaptation and demonstrate the spike mutations  
26 Y453F, F486L, and N501T all specifically adapt SARS-CoV-2 to use mustelid ACE2. Furthermore, we risk  
27 assess these mutations and conclude mink-adapted viruses are unlikely to pose an increased threat to  
28 humans, as Y453F attenuates the virus replication in human cells and all 3 mink-adaptations have

29 minimal antigenic impact. Finally, we show that certain SARS-CoV-2 variants emerging from circulation  
30 in humans may naturally have a greater propensity to infect mustelid hosts and therefore these  
31 species should continue to be surveyed for reverse zoonotic infections.

## 32 **Introduction**

33 SARS-CoV-2 is a betacoronavirus that is thought to have emerged from an animal source in  
34 2019 and rapidly spread by human-to-human transmission across the globe causing the COVID-19  
35 pandemic. SARS-CoV-2 is transmitted efficiently by the airborne route due to its ability to efficiently  
36 enter cells in the upper respiratory tract. The spike glycoprotein is responsible for host receptor  
37 binding and membrane fusion of coronaviruses. SARS-CoV-2 spike binds to host angiotensin-  
38 converting enzyme 2 (ACE2) via the receptor binding domain (RBD) and is activated by TMPRSS2  
39 protease expressed at the apical surface of the airway epithelium to mediate fusion<sup>1</sup>. In addition,  
40 compared to closely related coronaviruses, SARS-CoV-2 spike contains a tract of basic amino acids at  
41 the S1/S2 cleavage site that can be recognised by furin, enabling spike to be efficiently primed for  
42 fusion by TMPRSS2. This allows rapid fusion of spike at the cell surface and avoids restriction factors  
43 present in the late endosome and endolysosome<sup>2,3</sup>.

44 A series of molecular interactions between amino acids in the spike RBD and the interacting  
45 surface of ACE2 result in SARS-CoV-2 binding to human ACE2 with high affinity<sup>4,5</sup>. SARS-CoV-2 shows  
46 a broad host tropism and can experimentally infect many animal species, largely determined by the  
47 efficiency with which spike can interact with the animal ACE2 orthologues<sup>5,6</sup>. For example, mice are  
48 inefficiently infected by early SARS-CoV-2 isolates unless they are engineered to transgenically express  
49 human ACE2 or SARS-CoV-2 is adapted to murine ACE2 by serial mouse passage<sup>7,8</sup>.

50 From April 2020, reverse-zoonotic outbreaks (i.e. transmitted from humans into animals; also  
51 known as zooanthroponosis) of SARS-CoV-2 in mink farms were reported in the Netherlands, the USA,  
52 France, Spain, Denmark, Italy, Sweden, Canada, Greece, Lithuania, and Poland<sup>9-13</sup>. Multiple reverse  
53 zoonotic events introduced the virus from farm workers into densely populated farms that then

54 supported rapid transmission between animals<sup>12,13</sup>. Sequence analyses revealed several mutations in  
55 spike enriched after circulation in mink, most commonly the amino acid substitution Y453F or N501T;  
56 residues that map to the RBD of spike protein<sup>11-13</sup>. From June to November 2020, an outbreak of SARS-  
57 CoV-2 infections occurred among farmed mink in Denmark, with continuous spillover to farm workers  
58 and local communities with viruses harbouring Y453F<sup>13,14</sup>. This large-scale outbreak resulted in an  
59 estimated 4000 mink-associated human cases and promoted the Danish government to cull all 17  
60 million farmed mink in the country and several countries imposed total travel bans on the affected  
61 regions<sup>15</sup>. Of particular concern was the increased acquisition of spike mutations in mink-associated  
62 SARS-CoV-2 viruses, as demonstrated by the Cluster 5 variant identified in September 2020 which had  
63 several additional changes in the spike glycoprotein including,  $\Delta$ 69-70 in the N-terminal domain (NTD),  
64 and I692V and M1229I in S2<sup>16</sup>. Early data indicated a possible change in antigenicity whereby Cluster  
65 5 variant virus might be less readily neutralised by antibodies in convalescent sera from individuals  
66 infected by earlier variants<sup>16,17</sup>.

67 Ferrets are closely related to mink (both belong to the family *Mustelidae*) and have been used  
68 extensively as models for transmission of influenza virus due to their high susceptibility, comparable  
69 tissue tropism, and clinical signs similar to those seen in infected humans<sup>18</sup>. Consequently, ferrets  
70 have also been extensively characterised as models for SARS-CoV-2 transmission experiments and can  
71 support infection and transmission<sup>3,19,20</sup>. During experimental infection of SARS-CoV-2 in ferrets,  
72 several groups have independently reported mink-associated spike mutations Y453F or N501T<sup>12,19,21</sup>.  
73 Mink and ferret ACE2 are extremely similar with no amino acid differences that map to the ACE2/SARS-  
74 CoV-2 Spike interface (Supplementary Figure 1). Interestingly, both the Y453F and the N501T  
75 substitutions have also been associated with increased binding to human ACE2<sup>22</sup>. It is possible these  
76 mutations may act to non-specifically increase binding to several groups of mammalian ACE2 proteins.  
77 A similar mutation N501Y, which is also associated with increased human ACE2 binding is often found  
78 upon mouse adaptation of SARS-CoV-2 and is present in several human SARS-CoV-2 variants of  
79 concern showing signs of higher transmissibility<sup>23-25</sup>. It has been hypothesised for influenza virus that

80 increasing receptor binding avidity can result in non-specific antibody escape as the viral glycoprotein-  
81 host receptor interaction begins to outcompete that of antibody/viral glycoprotein <sup>26</sup>.

82 In this study, we risk assess mink or ferret adapted viruses and mutations to determine the  
83 threat that viruses adapted to mustelid species could pose to humans, and what impact they could  
84 have on global vaccine efforts.

## 85 **Results**

### 86 **Y435F and N501T substitutions in the spike are detected in viruses transmitted between ferrets.**

87 In a previous study, we experimentally infected four donor ferrets and tested the ability of  
88 SARS-CoV-2 to transmit to individually co-housed naive animals <sup>3</sup>. The early wildtype (WT) virus isolate,  
89 England/2/2020, which contains 614D, transmitted efficiently to 2 of 4 ferrets in direct contact with  
90 two infected donor animals (donor #1 and #2; Figure 1A). Here, we sequenced the spike RBD of virus  
91 extracted from nasal wash obtained at early and late time point from the direct contact ferrets. Of the  
92 two transmitted virus isolates, at the consensus level, one had gained N501T in the spike protein while  
93 the other had a mixture of Y453F and N501T. Both Y453F and N501T have previously been associated  
94 with experimental ferret adaptation of SARS-CoV-2 <sup>19,21</sup>. To investigate the dynamics of ferret  
95 adaptation in more detail, virus samples were deep sequenced from various times point across the 2  
96 successful ferret transmission chains (donor #1 to contact #1 and donor #2 to contact #2; Figure 1A).  
97 In donor animal #1, the virus rapidly gained majority N501T with Y453F as a minor variant. However,  
98 by day 5, both mutations were present in equal amounts with no detectable WT spike. In the matched  
99 contact animal (contact #1), the transmitted virus population included a mixture of Y453F with a  
100 minority of N501T and Y453F continued to predominate between days 4-6. In Donor/Contact pair #2,  
101 again both mutations were detected but N501T predominated across both animals at all time points  
102 tested. N501T alone predominated in the day 2 nasal washes from the two donor animals that did not  
103 transmit to their direct contacts (98% in one, 94% in the other), with remaining reads showing WT  
104 spike <sup>3</sup>. In the initial virus inoculum, N501T was detected at levels below 1% of total reads while Y453F

105 was not detected at all (read depth  $\approx$ 7000). No other consensus level mutations arose in any of the  
106 donor or contact ferrets anywhere else in the genome.

107           Interesting, by investigating all SARS-CoV-2 sequences isolated from mink reported on GISAID,  
108 we and others noted that N501T, Y453F, as well as F486L have independently arisen multiple times in  
109 mink, and in multiple lineages as illustrated in Figure 1B<sup>11,12</sup>. These observations further imply that  
110 these mutations are strongly associated with mustelid adaptation (Figure 1B).

111           Of all the mink-adapting substitutions, Y453F has been more frequently associated with  
112 spillback from mink into humans, including Cluster 5 in Denmark. To further investigate the effects of  
113 the Y453F substitution, we isolated virus from contact #1 from day 6 in Vero cells ('Ferret P2') and  
114 validated that the sequence change was maintained in the titrated virus stock (Figure 2A). The Vero  
115 grown virus stock was, in the majority, Y453F (~96%) with very minor variants, N501T and WT RBD  
116 also present (<5%). Outside of spike, the virus contained an additional mutation, S6L in the envelope  
117 gene (E) which was present in >70% of reads in the Vero grown stock.

#### 118 **Virus with Y453F shows enhanced replication and trended towards higher morbidity in ferrets**

119           To investigate whether the Y453F-containing virus showed greater replication in ferrets, we  
120 intranasally inoculated 4 naive ferrets with ferret P2 virus and compared levels of virus shed from the  
121 nose to 4 ferrets previously inoculated with the same infectious titre of parental England/2/2020 virus  
122 <sup>3</sup>(the same donors from Figure 1A). At days 1-2, the mean titre of Y453F virus shed in nasal washes  
123 was significantly higher than that of the parental virus, as determined by both E gene copy number  
124 and TCID<sub>50</sub> (Figure 2B,C). Both groups of ferrets showed comparable patterns of fever during infection,  
125 peaking between days 2-4, and the Y453F-infected ferrets trended towards more weight loss over the  
126 course of the experiment (Figure 2D,E). The titre of parental virus shed and fever in parental virus-  
127 infected animals approached that in the ferret P2 infected animals by days 3-4, likely because the  
128 parental virus had gained ferret-adapting mutations, such as Y453F or N501T, by this point (see Figure  
129 1A). Deep sequencing of the virus from the ferrets inoculated with the Y453F-containing ferret P2 virus

130 showed the Y453F substitution was maintained in all 4 animals throughout the course of infection  
131 (Figure 2F). The E gene substitution S6L, however, was rapidly selected against, indicating that this  
132 substitution could have been an adaptation to cell culture, selected in Vero cells during isolation and  
133 amplification of the virus from nasal wash (Figure 2G). Several further substitutions, all present at very  
134 low levels in the inoculum, rapidly grew to fixation in all 4 Y453F-infected ferrets. These encoded  
135 mutations in spike at D614N, in N protein at R68P and in the NSP2 protein at T632I (Figure 2G). It is  
136 unclear whether these substitutions are all *bona fide* ferret adaptations or mutations hitchhiking as  
137 part of a selective sweep. Spike D614N may exert a similar effect to the ubiquitous SARS-CoV-2 human  
138 adaptation D614G, to non-specifically enhance ACE2 binding by promoting the spike open  
139 conformation<sup>27</sup>. Overall, these data suggest that Y453F adapts the virus to ferret infection, but also  
140 further adaptations may arise during ongoing adaptation in mustelid hosts.

#### 141 **Y453F enhances cell entry using the mustelid ACE2 receptor**

142 Next, we tested whether Y453F and the other mustelid associated spike mutations improved  
143 the use of the otherwise suboptimal ferret ACE2<sup>28</sup>. We created a library of spike expression constructs,  
144 generated lentivirus-based pseudoviruses and assessed the entry of these into cells transiently  
145 expressing ACE2 from human, ferret or rat, or empty vector, as previously described<sup>28</sup>. We note that  
146 ferret ACE2 differs from that of mink by only two amino acid residues that are distal to the spike  
147 interaction interface, and therefore can be considered representative for both mustelid species (See  
148 Extended Data Figure S1).

149 While WT (D614G) spike uses ferret ACE2 poorly for entry (>10-fold less well than human  
150 ACE2), the adaptations Y453F, N501T or F486L, as well as full Cluster 5 spike ( $\Delta$ 69/70, Y453F, D614G,  
151 I692V, M1229I), all allowed SARS-CoV-2 spike expressing pseudoviruses to enter into human- or ferret-  
152 , but not rat-, ACE2 expressing cells with much greater efficiency (Figure 3A, B, Extended Data Figure  
153 2A). A nearby substitution, L452M, which has also appeared in at least one mink farm outbreaks<sup>11</sup> has  
154 no effect suggesting this is not a specific adaptation to mink (Figure 3A). Furthermore, this effect was

155 not dependent on the presence or absence of D614G, as Y453F in a 614D background showed a similar  
156 effect (Figure 3C, Extended data Figure 2B). Consistent results were also seen using a cell-cell fusion  
157 assay (Extended data Figure 2C,D). Examining the structure of the spike RBD/ACE2 interface, each of  
158 these mink/ferret-adaptations is close to residues that differ between human and mustelid ACE2, as  
159 others have previously modelled <sup>29</sup>. For example, Y453F lies close to H34Y (histidine in human ACE2,  
160 tyrosine in mustelid), N501T lies close to G354R, and F486L lies between ACE2 residues L79H, M82T  
161 and Q24L (Figure 3D).

162 **Viruses containing Y453F mutation are attenuated for replication in primary human airway**  
163 **epithelial cells**

164 To assess the impact of the Y453F mutation on the replication of virus in human airway  
165 epithelium, we infected primary human bronchial cells cultured at an air liquid interface with a mix of  
166 the parental and ferret P2 viruses at a low multiplicity of infection (MOI) of around 0.1 (Figure 4A).  
167 Samples were taken 24, 48 and 72 hours post-infection and analysed by deep sequencing. The WT  
168 virus significantly outcompeted Y453F, with less than ~5% of reads by 48 hours post infection  
169 containing Y453F.

170 Although the Y453F containing virus is highly similar to that which circulated in mink early in  
171 the pandemic, the most prominent zoonotic spillover from mink was the Cluster 5 virus, which further  
172 contained D614G and  $\Delta$ 69-70. D614G and  $\Delta$ 69-70 are thought to potentially enhance virus infectivity  
173 in some backgrounds <sup>30</sup>. Therefore, we performed a similar competition experiment between a mixed  
174 inoculum of 40% Cluster 5 isolate and 60% early B.1 lineage, D614G containing virus ('WT'; IC19).  
175 Again, we observed that the Y453F-containing Cluster 5 was outcompeted, constituting only ~10% of  
176 reads by 24 hours post-infection (Figure 4B).

177 Finally, to further confirm that the attenuation of the Y453F containing viruses, particularly  
178 the ferret-adapted strain, wasn't due to other changes in the genome (such as E S6L described above)  
179 we generated by reverse genetics (RG) two viruses on a Wuhan-hu-1, both carrying the D614G

180 mutation in spike, WT (D614G), while the other additionally contained Y453F (D614G + Y453F). As with  
181 the ferret adapted P2 virus and Cluster 5 isolate we saw that the Y453F + D614G RG virus produced  
182 less infectious virus upon replication in the primary airway cells as compared to the otherwise isogenic  
183 WT (D614G) virus, significantly so at 24 hours post-infection (Figure 4C).

#### 184 **Mink adaptation has a minimal effect on SARS-CoV-2 antigenicity**

185 To investigate whether a mustelid-adapted SARS-CoV-2 crossing back into the human  
186 population would have a large impact on re-infections or vaccine-breakthrough we next tested  
187 whether the mutation at Y453F facilitated escape from antibody neutralization. Surprisingly, Y453F-  
188 containing 'Ferret P2' virus was significantly *more easily* neutralised by convalescent first wave  
189 antisera than wild type requiring only 0.6 as much antisera for a 50% neutralisation titre (Figure 5A).  
190 We further investigated the relative antigenicity of Y453F, this time using the above-described RG  
191 viruses and antisera from health care workers who had received two doses the of Pfizer-BioNtech-  
192 BNT162b2 vaccine. Again, we saw the Y453F-containing virus was more readily neutralised by 7 of the  
193 10 vaccinee sera, although the difference was not significant (Figure 5B).

194 We next performed pseudovirus neutralisation assays with the previously described first wave  
195 convalescent antisera against pseudoviruses expressing the common mustelid adaptations or with full  
196 Cluster 5 spike. The B.1.351 (Beta) spike showed a significant, ~5-fold drop in mean NT<sub>50</sub> (Figure 5C),  
197 consistent with this virus being more difficult to neutralise with first wave antisera <sup>31</sup>. None of the  
198 tested mink/ferret adaptations had any significant impact on antigenicity.

#### 199 **Many circulating variants of concern show a greater ability to enter via mustelid ACE2.**

200 Following worldwide circulation of SARS-CoV-2, a number of 'variant of concern' and 'variant  
201 of interest' lineages have arisen associated with properties such as increased transmissibility, higher  
202 pathogenicity, and antigenic escape <sup>32</sup>. These generally locally, or globally, outcompeted other  
203 lineages to become predominant, including the Alpha variant (B.1.1.7), first associated with infections



204 the UK <sup>23</sup>. A number of these variants have RBD mutations such as L452R, E484K and/or N501Y which  
205 are thought to promote humans ACE2 binding <sup>22</sup>.

206 To investigate whether these variants may be more able to infect mink or ferrets than the  
207 progenitor lineage B or B.1 viruses through better use of mustelid ACE2, we again used pseudoviruses  
208 expressing these variant spike proteins and normalised entry to human ACE2 (Figure 6). We found  
209 that nearly all variants of concern tested could better utilise mink ACE2 than WT (D614G only)  
210 pseudovirus. B.1.1.7/E484K, Iota/B.1.526+E484K (first associated with infections in New York),  
211 Eta/B.1.525 (a variant with associations with West Africa) and L452R (in multiple variants of concern,  
212 including Epsilon/B.1.427/B.1.429, first associated with infections in California and Delta/B.1.617.2,  
213 which is currently replacing all other SARS-CoV-2 lineages globally) all allowed pseudovirus to utilise  
214 ferret ACE2 for cell entry to almost the same degree as human ACE2. Alpha/B.1.1.7 and Beta/B.1.351  
215 spikes showed a much more modest boost while Gamma/P.1 (first found in Japan in travellers from  
216 Brazil) showed no improved usage of ferret ACE2. It appears L452R, E484K and N501Y may promote  
217 use of ferret ACE2, while K417N/T may result in a greater reduction in ferret ACE2 usage relative to  
218 human ACE2. Overall, these data suggest multiple circulating variants of concern may be able to infect  
219 mustelid hosts with only minimal, or indeed without, further adaptation.

## 220 **Discussion**

221 In this study, we have performed a full risk assessment of mustelid hosts, such as mink and  
222 ferrets, as reservoirs for the emergence of antigenic variants or new variant of concern. We have  
223 shown SARS-CoV-2 is poorly adapted to mustelid ACE2 and therefore quickly gains adaptations, such  
224 as Y453F, N501T or F486L to utilise mustelid ACE2. However, Y453F in particular, negatively impacts  
225 replication kinetics of SARS-CoV-2 in human cells, potentially explaining why the Danish mink-origin  
226 outbreaks did not propagate further following the culling of the mink. Furthermore, in line with other  
227 studies <sup>16,17,31</sup>, we found none of these mutations had a large antigenic impact, so vaccination is likely  
228 to remain effective against mustelid-adapted strains. Finally, we have shown that several VOC strains,

229 or VOC-associated mutations, partially adapt SARS-CoV-2 spike to mustelid ACE2. Therefore, it is likely  
230 VOC lineages will continue to infect mink farms and risk spilling back over into humans.

231 Except for the Danish mink-adapted SARS-CoV-2 spillback, Y453F is found rarely in humans  
232 with very few isolates reported in GISAID and only a single report of the mutation arising in  
233 immunocompromised patients – this is despite Y453F having been shown in several studies to  
234 enhance human ACE2 binding, in a similar manner to the VOC-associated mutations N501Y or L452R  
235 <sup>22,33,34</sup>. This would suggest that unlike the VOC-associated mutations such as N501Y, Y453F affects viral  
236 fitness in human cells. We have shown that, even in the presence of the putative stabilising NTD  
237 deletion,  $\Delta 69-70$  <sup>30</sup>, virus harbouring the Y453F substitution was outcompeted by a closely related  
238 virus in human cells.

239 Here, we have demonstrated many VOCs, particularly Alpha/B.1.1.7 as well as those  
240 containing L452R (such as Delta/B.1.617.2) could have a fundamental fitness advantage in mink by  
241 increasing interaction with mustelid ACE2, compared to previous non-variant strains. At present  
242 (August 2021), the vast majority of mink-origin SARS-CoV-2 sequences on GISAID are from the year  
243 2020, even though there are a number of ongoing mink outbreaks reported in Europe <sup>35,36</sup>, suggesting  
244 a significant reporting lag. None of the four WHO-designated variants of concern have yet been  
245 associated with mink farm outbreaks. It remains to be seen whether these VOCs would replicate in  
246 mink/ferrets without any further adaptation, but we have shown that the most common mustelid  
247 adaptations would be unlikely to have a large effect on VOC antigenicity. It will be key in the coming  
248 years to continue to closely survey farmed mink and to sequence and share any SARS-CoV-2 genomes  
249 from these animals in a timely manner as SARS-CoV-2 could still adapt in unexpected ways in mink <sup>37</sup>.

250 This work also suggests that, particularly when investigating spike RBD mutants, ferrets (or  
251 indeed mink) are poor models for humans, as mustelid ACE2 is poorly utilised by non-adapted SARS-  
252 CoV-2 spike. Thus, it is not a given that adaptation to human ACE2 will also result in increased  
253 infectiousness, transmissibility or pathogenicity in the ferret model. However, ferrets remain a useful

254 model for investigating non-RBD phenotypes though care should be taken to use previously ferret  
255 adapted viruses to prevent rapid adaptation.

## 256 **Methods**

### 257 **Biosafety and ethics statement**

258 All laboratory work was approved by the local genetic manipulation safety committee of  
259 Imperial College London, St. Mary's Campus (centre number GM77), and the Health and Safety  
260 Executive of the United Kingdom, under reference CBA1.77.20.1. SARS-CoV-2 reverse genetics work  
261 was performed at CVR University of Glasgow under HSE GM notification number is GM223/20.1a.  
262 Animal research was carried out under a United Kingdom Home Office License, P48DAD9B4.

263 Healthcare workers convalescent antisera samples from the REACT2 studies were taken in  
264 concordance with the World Medical Association's Declaration of Helsinki. Ethical approval was  
265 approved by the South Central-Berkshire B Research Ethic Committee (REC ref: 20/SC/0206; IRAS  
266 283805). Sera from BNT162b2 vaccinated healthcare workers <sup>38</sup> were collected as part of a study  
267 approved by the Health Research Authority (REC ref: 20/WA/0123).

### 268 **Cells**

269 African green monkey kidney cells (Vero; Nuvonis Technologies) were maintained in OptiPRO  
270 SFM (Life Tech) containing 2x GlutaMAX (Gibco). Human embryonic kidney cells (293T; ATCC; ATCC  
271 CRL-11268) were maintained in Dulbecco's modified Eagle's medium (DMEM; Gibco), 10% fetal calf  
272 serum (FCS), 1x non-essential amino acids (NEAA; Gibco), 1x penicillin-streptomycin (P/S; Gibco).  
273 Stably transduced ACE2-expressing 293T cells were produced as previously described <sup>3,39</sup>, and  
274 maintained with the addition of 1 µg ml<sup>-1</sup> puromycin to growth medium. Baby hamster kidney cells  
275 (BHK-21; ATCC CCL-10) were maintained in DMEM (Sigma-Aldrich) supplemented with 10% FCS, 1 mM  
276 sodium pyruvate solution (Sigma-Aldrich, Germany), and 1x P/S. Air-liquid interface human airway  
277 epithelium (HAEs) cells were purchased from Epithelix and maintained in Mucilair cell culture medium

278 (Epithelix). All cell lines were maintained at 37 °C, 5% CO<sub>2</sub>. Cell lines were not tested for mycoplasma  
279 contamination.

## 280 **Viruses, reverse genetics and growth kinetics**

281 The early SARS-CoV-2 strain, England/2/2020 (VE6-T) was previously isolated by Public Health  
282 England as previously described <sup>40</sup>. The D614G containing strain, SARS-CoV-2/England/IC19/2020, was  
283 used as previously described <sup>41</sup>. The Cluster 5 isolate - SARS-CoV-2/hu/DK/CL-5/1 – was isolated as  
284 previously described <sup>16</sup> and was kindly provided by Kevin Bewley at Public Health England. All viral  
285 stocks used in this study were grown in Vero cells in OptiPRO SFM containing 2x GlutaMAX. Virus  
286 titration was performed by median tissue culture infectious dose (TCID<sub>50</sub>) on Vero cells as described  
287 previously <sup>3</sup>.

288 Virus growth kinetics and competition assays were performed as described previously <sup>3,42</sup>.  
289 Briefly, in air-liquid interface HAEs, before infection cells were washed with serum-free media to  
290 remove mucus and debris. Cells were infected with 200 µL of virus-containing serum-free DMEM and  
291 incubated at 37°C for 1 h. Inoculum was then removed and cells were washed twice. Time points were  
292 taken by adding 200 µL of serum-free DMEM and incubating for 10 mins and 37°C before removal and  
293 titration.

294 Transformation-Associated Recombination (TAR) method in yeast was used to generate the  
295 mutant viruses described in this study. We followed essentially previously described methods <sup>43</sup> with  
296 some modifications. Briefly, a set of overlapping cDNA fragments representing the entire genome of  
297 SARS-CoV-2 Wuhan isolate (GenBank: MN908947.3) were chemically synthesized and cloned into  
298 pUC57-Kan (Bio Basic Canada Inc). Where appropriate the relevant synthetic cDNA fragment carried  
299 the mutation D614G or Y453F + D614G in the viral S gene. The cDNA fragment representing the 5'  
300 terminus of the viral genome contained the bacteriophage T7 RNA polymerase promoter preceded by  
301 a short sequence stretch homologous to the *Xho*I-cut end of the TAR in yeast vector pEB2 <sup>44</sup>. The  
302 fragment representing the 3' terminus contained the T7 RNA polymerase termination sequences

303 followed by a short segment homologous to the *Bam*HI-cut end of pEB2. These cDNA fragments were  
304 excised by restriction digestion and gel-extracted or PCR-amplified using appropriate primers. These  
305 fragments were then pooled and co-transformed with *Xho*I-*Bam*HI-cut pEB2 into the *Saccharomyces*  
306 *cerevisiae* strain TYC1 (MATa, *ura3-52*, *leu2Δ1*, *cyh2<sup>r</sup>*, containing a knockout of DNA Ligase 4)<sup>44</sup> that  
307 had been made competent for DNA uptake using the LiCl<sub>2</sub>-based Yeast transformation kit (YEAST1-  
308 1KT; Merck). The transformed cells were plated on minimal synthetic defined (SD) agar medium  
309 lacking uracil (Ura) but containing 0.002% (w/v) cycloheximide to prevent selection of cells carrying  
310 the empty vector. Following incubation at 30°C for 4 to 5 days, colonies of the yeast transformants  
311 were screened by PCR using specific primers to identify those carrying plasmid with fully assembled  
312 genomes. Selected positive colonies were then expanded to grow in 200 ml SD-Ura dropout medium  
313 and the plasmid extracted as described by Thao et al. (2020)<sup>43</sup>. Approximately 4 μg of the extracted  
314 material was then used as template to *in vitro* synthesized viral genomic RNA transcripts using the  
315 Ribomax T7 RNA transcription Kit (Promega) and Ribo m7G Cap Analogue (Promega) as per the  
316 manufacturer's protocol. Approximately 2.5 μg of the *in vitro* synthesized RNA was used to transfect  
317 ~6 x10<sup>5</sup> BHK-hACE2-N cells stably expressing the SARS-CoV-2 N and the human ACE2 genes<sup>45</sup> using  
318 the MessengerMax lipofection kit (Thermo Scientific) as per the manufacturer's instructions. Cells  
319 were then incubated until signs of viral replication (syncytia formation) became visible (usually after  
320 2-3 days), at which time the medium was collected (P0 stock) and used further as a source of rescued  
321 virus to infect VERO E6 cells to generate P1 and P2 stocks. Full genome sequences of viruses collected  
322 from from P0 and P1 stocks were obtained in order to confirm the presence of the desired mutations  
323 and exclude the presence of other spurious mutations. Viruses were sequenced using Oxford  
324 Nanopore as previously described<sup>46</sup>.

### 325 **E gene RT-qPCR**

326 Virus genomes were quantified by E gene RT-qPCR as previously described<sup>47</sup>. Viral RNA was  
327 extracted from supernatants of swab material using the QIAasymphony DSP Virus/Pathogen Mini Kit

328 on the QIA Symphony instrument (Qiagen). RT-qPCR was then performed using the AgPath RT-PCR (Life  
329 Technologies) kit on a QuantStudio™ 7 Flex Real-Time PCR System with the primers specific for SARS-  
330 CoV-2 E gene<sup>48</sup>. For absolutely quantification of E gene RNA copies, a standard curve was generated  
331 using dilutions viral RNA of known copy number. E gene copies per ml of original virus supernatant  
332 were then calculated using this standard curve.

### 333 **Live virus neutralisation**

334 Convalescent antisera from health care workers who had tested positive by RT-qPCR were  
335 taken from the REACT2 study as described previously<sup>49,50</sup>. Double dose BNT162b2 (Pfizer-BioNtech)  
336 antisera from health care workers was generated as previously described<sup>38</sup>.

337 Live virus neutralisation assays were performed in Vero cells as described elsewhere<sup>42</sup>. Briefly  
338 serial dilutions of sera were incubated with 100 TCID<sub>50</sub> of virus for 1 h at room temperature then  
339 transferred to 96 well plates of Vero cells. Plates were incubated at 37°C, 5% CO<sub>2</sub> for 42 h before fixing  
340 cells in 4% paraformaldehyde (PFA). Cells were permeabilised in methanol 0.6% H<sub>2</sub>O<sub>2</sub> and stained for  
341 1 h with an antibody against SARS-CoV-2 nucleocapsid protein (Sino Biological; 40143-R019, 1:300  
342 dilution). Cells were further stained with the secondary antibody anti-rabbit HRP conjugate (Sigma;  
343 1:3000 dilution) for 1 h. TMB substrate (Europa Bioproducts) was added and developed for 20 mins  
344 before halting the reaction with 1M HCl. Plates were read at 450nm and 620nm and the concentration  
345 of serum needed to reduce virus signal by 50% was calculated to give NT50 values.

346 For the CPE-based neutralisation assay (reverse genetics virus vs Pfizer antisera), serial  
347 dilutions of sera were incubated with 100 TCID<sub>50</sub> of virus for 1 h at 37°C, 5% CO<sub>2</sub> in 96 well plates  
348 before a suspension of Vero-ACE2-TMPRSS2 cells were added and incubated for 3 days at 37°C, 5%  
349 CO<sub>2</sub>. Wells were stained using crystal violet, scored for the presence of virus-induced cytopathic effect  
350 and the reciprocal of the highest serum dilution at which protection was seen was calculated as the  
351 serum titre.

## 352 **Plasmids and cloning**

353           Lentiviral packaging constructs pCSLW and pCAGGs-GAGPOL were made as previously  
354 described. Mutant SARS-CoV-2 expression plasmids were generated by site-directed mutagenesis  
355 using the QuikChange Lightning Multi Site-Directed Mutagenesis Kit (Agilent). Unless otherwise stated  
356 all SARS-CoV-2 spike expression plasmids were based on the Wuhan-hu-1 reference sequence <sup>41</sup>, with  
357 the additional substitutions D614G and K1255\*STOP (aka the  $\Delta$ 19 mutation or cytoplasmic tail  
358 truncation). Animal ACE2 proteins in pDisplay were generated and used as previously described <sup>5</sup>.

## 359 **Pseudovirus assays**

360           SARS-CoV-2 spike-bearing lentiviral pseudotypes (PV) were generated as described previously  
361 <sup>3,28</sup>. At ICL, 100 mm dishes of 293Ts were transfected using lipofectamine 3000 (Thermo) with a  
362 mixture of pCSFLW, pCAGGS-GAGPOL and spike proteins expressed in pcDNA3.1. After 24 h  
363 supernatant was discarded and replaced. Pseudovirus-containing supernatant was collected and  
364 pooled at 48 and 72 h post-transfection, passed through a 0.45  $\mu$ m filter, aliquoted and frozen at -  
365 80°C. At the Pirbright Institute pseudovirus was generated in 6-well plates. Cells were transfected  
366 using polyethyleneimine (PEI) with a mixture of pCSFLW, p8.91 and SARS-CoV-2 spikes expressed in  
367 pcDNA3.1. As before supernatant was discarded and replaced at 24 h post-transfection then  
368 harvested and pooled at 48 and 72h. Supernatant was clarified by low-speed centrifugation, aliquoted  
369 and frozen at -80°C.

370           Pseudovirus assays at ICL were performed as previously described <sup>3</sup>. Briefly 10mm diameter  
371 dishes of 293T cells were transfected with 1  $\mu$ g of ACE2 of empty vector using lipofectamine 3000. 24  
372 h later cells media was replaced, and cells were resuspended by scraping and plated into 96 well plates  
373 and overlaid with pseudovirus. 48 h later cells were lysed with reporter lysis buffer (Promega) and  
374 assays were read on a FLUOstar Omega plate reader (BMF Labtech) using the Luciferase Assay System  
375 (Promega).

376 At Pirbright assays were performed largely as previously described <sup>28</sup>. Briefly, BHK-21 cells  
377 were transfected with 500 ng of ACE2 or empty vector (pDISPLAY) using TransIT-X2 (Mirus Bio)  
378 according to the manufacturer's recommendation. 24 h later, media was removed, and cells were  
379 harvested following the addition of 2mM EDTA in PBS, resuspended in DMEM and plated into white-  
380 bottomed 96 wells plates (Corning). Cell were overlaid with pseudovirus 24 h later and incubated  
381 for 48 h. Firefly luciferase was quantified whereby media was replaced with 50 µL Bright-Glo substrate  
382 (Promega) diluted 1:2 with PBS and read on a GloMax Multi+ Detection System (Promega). CSV files  
383 were exported onto a USB flash drive for analysis.

384 Pseudovirus neutralisation assays were performed by incubating serial dilutions of heat-  
385 inactivated human convalescent antisera with a set amount of pseudovirus. Antisera/pseudovirus mix  
386 was then incubated at 37°C for 1 h then overlaid into 96 well plates of 293T-ACE2 cells. Assays were  
387 then lysed and read as described above.

#### 388 **Cell-cell fusion assay**

389 Cell-cell fusion assays were performed as described elsewhere <sup>28,51</sup>. Briefly, 293Ts stably  
390 expressing rLuc-GFP 1-7 effector cells <sup>52</sup> were transfected with empty vector, WT or mutant SARS-CoV-  
391 2 spike proteins. BHK-21 target cells stably expressing rLuc-GFP-8-11 (target cells) were co-transfected  
392 with ACE2 expression constructs. Target cells were co-cultured with effector cells 24 h post-  
393 transfection and quantification of cell-cell fusion was performed 24 h later with the *Renilla* luciferase  
394 substrate, Coelenterazine-H (Promega). Luminescence was read on a Glomax Multi+ Detection System  
395 (Promega). CSV files were exported on a USB flash drive for analysis.

#### 396 **Ferret infection study**

397 Ferret (*Mustela putorius furo*) infection studies with SARS-CoV-2 virus were performed as  
398 described previously <sup>3</sup>. All ferret studies were performed in a containment level 3 laboratory, using a  
399 bespoke isolator system (Bell Isolation Systems). Outbred female ferrets (16–20 weeks old) weighing



400 750–1,000 g were used. Four donor ferrets were inoculated intranasally with 200  $\mu$ l of  $10^5$  p.f.u. of  
401 each virus while lightly anaesthetized with ketamine (22 mg kg<sup>-1</sup>) and xylazine (0.9 mg kg<sup>-1</sup>).

402 Prior to the start of the study ferrets were confirmed to be seronegative to SARS-CoV-2. All  
403 animals were nasal-washed daily, while conscious, by instilling 2 ml of PBS into the nostrils; the  
404 expectorate was collected into disposable 250-ml sample pots. Ferrets were weighed daily post  
405 infection, and body temperature was measured daily via subcutaneous IPTT-300 transponder (Plexx  
406 B.V).

### 407 **RNA extraction and sequencing**

408 For Sanger sequencing, RNA was extracted from nasal washes using QIAamp viral RNA mini  
409 kit (Qiagen). RNA was reverse transcribed using Superscript IV (Invitrogen) and PCR of the spike was  
410 performed using KOD polymerase (Merck). For next generation sequencing RNA from virus-containing  
411 samples were extracted using the QIASymphony DSP Virus/Pathogen mini kit (Qiagen). RNA was  
412 DNase-treated using the TURBO-free Kit (Invitrogen; (AM1907). cDNA was synthesised using the  
413 superscript IV reverse transcriptase (Invitrogen) and random primer mix (NEB) before amplification by  
414 the ARTIC Network protocol using the multiplexed primer scheme version 3. Fast5 files were  
415 basecalled with guppy (v.5.0.7) with high accuracy calling (hac). The fastq files produced by Nanopore  
416 sequencing were filtered with lengths 400 and 700 using Artic-ncov2019 pipeline v1.2.1  
417 (<https://artic.network/ncov-2019/ncov2019-bioinformatics-sop.html>) by “artic guppyplex” function.  
418 The other function of “artic minion” in the Artic-ncov2019 pipeline with “--medaka --medaka-model  
419 r941\_min\_high\_g360 --normalise 0” parameters was then used to process the filtered fastq files to  
420 generate ARTIC V3 primer trimmed bam files and consensus genome sequences. These primer  
421 trimmed bam files were further analysed using DiversiTools (<http://josephhughes.github.io/btctools/>)  
422 with the “-orfs” function to generate the ratio of amino acid change in the reads and coverage at each  
423 site of protein in comparison to the reference SARS-CoV-2 genome (MN908947.3) as we previous  
424 description<sup>53</sup>.

## 425 **Phylogenetic analysis**

426 All sequences with host species labelled as *Neovison vison* were retrieved from the Global  
427 Initiative on Sharing All Influenza Data (GISAID) database (sequences retrieved on 7 July 2021). A table  
428 of accession IDs and acknowledgement is given in Supplementary Table S1. A sequence with only 397  
429 nucleotides (hCoV-19/mink/Spain/NV-2105/2021, EPI\_ISL\_1490748) was excluded from analysis.  
430 Sequences were aligned to the Wuhan-Hu-1 reference genome sequence (MN908947)<sup>54</sup> using MAFFT  
431 v7.475<sup>55</sup> and the alignment was then checked manually. Seven further sequences were excluded from  
432 further analysis as they lacked nucleotide data enabling the determination of amino acid identity at  
433 spike positions 453, 486, 501 or 614 (hCoV-19/mink/USA/MI-CDC-II10-7265/2020, EPI\_ISL\_925307;  
434 hCoV-19/mink/USA/MI-CDC-IHWB-7153/2020, EPI\_ISL\_925308; hCoV-19/mink/USA/WI-CDC-CX2X-  
435 2436/2020, EPI\_ISL\_1014948; hCoV-19/mink/Netherlands/NB-EMC-3-5/2020, EPI\_ISL\_523094; hCoV-  
436 19/mink/Netherlands/NB-EMC-3-4/2020, EPI\_ISL\_523093; hCoV-19/mink/Netherlands/NB-EMC-40-  
437 4/2020, EPI\_ISL\_577788; hCoV-19/mink/Denmark/mDK-56/2020, EPI\_ISL\_641448). Epidemiological  
438 lineages were determined using the Pangolin COVID-19 Lineage Assigner<sup>56,57</sup> (pangolin v3.1.5,  
439 pangoLEARN v15/06/2021). Phylogenetic analysis was performed using the remaining 936 mink  
440 genomes rooted on the Wuhan-Hu-1 reference genome (MN908947) with a general time reversible  
441 model of nucleotide substitution, a proportion of invariant sites estimated from the data and a gamma  
442 distribution describing among-site rate variation (GTR + I +  $\Gamma$ ) built using RAxML v8.0.0<sup>58</sup> with the  
443 phylogeny rooted on the sequence of the virus Wuhan-Hu-1. The maximum likelihood phylogeny was  
444 plotted, alongside data on sampling location extracted from the virus name and amino acid identity  
445 at spike positions 453, 486, 501 and 614, in R using the *ggtree* package<sup>59</sup>.

## 446 **Statistics and reproducibility**

447 Statistics throughout this study were performed using one-way analysis of variance (ANOVA)  
448 or Student's *t*-test and are described in the figure legends. No statistical method was used to  
449 predetermine sample size. Several genome sequences were manually removed from the phylogenetic

450 analysis and were described in the associated sections. The experiments were not randomized, and  
451 the investigators were not blinded to allocation during experiments and outcome assessment.

## 452 **Competing interests**

453 The authors declare no competing interests.

## 454 **Acknowledgements**

455 The SARS-CoV-2 virus isolate, England/2 was provided by Public Health England, and we thank  
456 M. Zambon, R. Gopal and M. Patel for their help. The authors would also like to thank Kevin Bewley of  
457 Public Health England for help obtaining the Cluster 5 isolate, SARS-CoV-2/hu/DK/CL-5/1 and Michelle  
458 Willicombe, Maria Predecki and Candice Clarke for their help obtaining the Pfizer double dose  
459 antisera. We also thank E. J. Louis, University of Leicester for generously providing the TAR in yeast  
460 system. The authors thank all researchers who have shared genome data openly via the Global  
461 Initiative on Sharing All Influenza Data (GIASID).

462 This work was supported by the G2P-UK National Virology Consortium funded by the MRC  
463 (MR/W005611/1). Additional funding to DB, AM, NT and GG were funded by The Pirbright Institute's  
464 BBSRC institute strategic programme grant (BBS/E/I/00007038). SARS-CoV-2 research for JAH, RPR,  
465 HG, ID-B, XD and NPR is supported by the U.S. Food and Drug Administration Medical  
466 Countermeasures Initiative contract (5F40120C00085). The work at the CVR was also supported by  
467 the MRC grants (MC\_UU12014/2) and the Wellcome Trust (206369/Z/17/Z).

468 The article reflects the views of the authors and does not represent the views or policies of  
469 the FDA.

## 470 **Contributions**

471 JZ, TPP, JB, DHG, DB and WSB conceived and planned the experiments. JZ, TPP, JCB, DHG,  
472 AMEE, RP-R, VMC, GDL, WF, WTH, RK, LB, RF, RL, NT, GG, HG, ID-B, XD, NPR, FS, MCG and PFM

473 performed the experiments and analysed the data. AHP, MP, JAH, DB and WSB provided supervision.

474 TPP and WSB wrote the manuscript with input from all other authors.

## 475 References

- 476 1 Hoffmann, M. *et al.* SARS-CoV-2 Cell Entry Depends on ACE2 and TMPRSS2 and Is Blocked by  
477 a Clinically Proven Protease Inhibitor. *Cell* **181**, 271-280 e278, doi:10.1016/j.cell.2020.02.052  
478 (2020).
- 479 2 Hoffmann, M., Kleine-Weber, H. & Pöhlmann, S. A Multibasic Cleavage Site in the Spike Protein  
480 of SARS-CoV-2 Is Essential for Infection of Human Lung Cells. *Mol Cell* **78**, 779-784.e775,  
481 doi:10.1016/j.molcel.2020.04.022 (2020).
- 482 3 Peacock, T. P. *et al.* The furin cleavage site in the SARS-CoV-2 spike protein is required for  
483 transmission in ferrets. *Nat Microbiol*, doi:10.1038/s41564-021-00908-w (2021).
- 484 4 Yan, R. *et al.* Structural basis for the recognition of SARS-CoV-2 by full-length human ACE2.  
485 *Science* **367**, 1444-1448, doi:10.1126/science.abb2762 (2020).
- 486 5 Conceicao, C. *et al.* The SARS-CoV-2 Spike protein has a broad tropism for mammalian ACE2  
487 proteins. *bioRxiv*, 2020.2006.2017.156471, doi:10.1101/2020.06.17.156471 (2020).
- 488 6 Zhao, X. *et al.* Broad and Differential Animal Angiotensin-Converting Enzyme 2 Receptor Usage  
489 by SARS-CoV-2. *Journal of Virology* **94**, e00940-00920, doi:10.1128/jvi.00940-20 (2020).
- 490 7 Gu, H. *et al.* Adaptation of SARS-CoV-2 in BALB/c mice for testing vaccine efficacy. *Science* **369**,  
491 1603-1607, doi:10.1126/science.abc4730 (2020).
- 492 8 Rathnasinghe, R. *et al.* The N501Y mutation in SARS-CoV-2 spike leads to morbidity in obese  
493 and aged mice and is neutralized by convalescent and post-vaccination human sera. *medRxiv*,  
494 2021.2001.2019.21249592, doi:10.1101/2021.01.19.21249592 (2021).
- 495 9 OIE. *Events in animals*, <[https://www.oie.int/en/scientific-expertise/specific-information-  
496 and-recommendations/questions-and-answers-on-2019-novel-coronavirus/events-in-  
497 animals/](https://www.oie.int/en/scientific-expertise/specific-information-and-recommendations/questions-and-answers-on-2019-novel-coronavirus/events-in-animals/)> (2021).
- 498 10 Rabalski, L. *et al.* Detection and molecular characterisation of SARS-CoV-2 in farmed mink  
499 (<em>Neovision vision</em>) in Poland. *bioRxiv*, 2020.2012.2024.422670,  
500 doi:10.1101/2020.12.24.422670 (2020).
- 501 11 Lu, L. *et al.* Adaptation, spread and transmission of SARS-CoV-2 in farmed minks and related  
502 humans in the Netherlands. *bioRxiv*, 2021.2007.2013.452160,  
503 doi:10.1101/2021.07.13.452160 (2021).
- 504 12 Oude Munnink, B. B. *et al.* Transmission of SARS-CoV-2 on mink farms between humans and  
505 mink and back to humans. *Science*, doi:10.1126/science.abe5901 (2020).
- 506 13 Hammer, A. S. *et al.* SARS-CoV-2 Transmission between Mink (Neovision vison) and Humans,  
507 Denmark. *Emerg Infect Dis* **27**, 547-551, doi:10.3201/eid2702.203794 (2021).
- 508 14 Larsen, H. D. *et al.* Preliminary report of an outbreak of SARS-CoV-2 in mink and mink farmers  
509 associated with community spread, Denmark, June to November 2020. *Euro Surveill* **26**,  
510 doi:10.2807/1560-7917.Es.2021.26.5.210009 (2021).
- 511 15 Ministry of Environment and Food of Denmark. *COVID-19: all mink in Denmark must be culled*,  
512 <<https://en.mfvm.dk/news/news/nyhed/covid-19-all-mink-in-denmark-must-be-culled/>>  
513 (2020).
- 514 16 Lassaunière, R. *et al.* In vitro Characterization of Fitness and Convalescent Antibody  
515 Neutralization of SARS-CoV-2 Cluster 5 Variant Emerging in Mink at Danish Farms. *Frontiers in*  
516 *Microbiology* **12**, doi:10.3389/fmicb.2021.698944 (2021).
- 517 17 Hoffmann, M. *et al.* SARS-CoV-2 mutations acquired in mink reduce antibody-mediated  
518 neutralization. *bioRxiv*, 2021.2002.2012.430998, doi:10.1101/2021.02.12.430998 (2021).

- 519 18 Belser, J. A. *et al.* Ferrets as Models for Influenza Virus Transmission Studies and Pandemic  
520 Risk Assessments. *Emerg Infect Dis* **24**, 965-971, doi:10.3201/eid2406.172114 (2018).
- 521 19 Richard, M. *et al.* SARS-CoV-2 is transmitted via contact and via the air between ferrets. *Nat*  
522 *Commun* **11**, 3496, doi:10.1038/s41467-020-17367-2 (2020).
- 523 20 Kim, Y. I. *et al.* Infection and Rapid Transmission of SARS-CoV-2 in Ferrets. *Cell Host Microbe*  
524 **27**, 704-709 e702, doi:10.1016/j.chom.2020.03.023 (2020).
- 525 21 Everett, H. E. *et al.* Intranasal Infection of Ferrets with SARS-CoV-2 as a Model for  
526 Asymptomatic Human Infection. *Viruses* **13**, 113 (2021).
- 527 22 Starr, T. N. *et al.* Deep Mutational Scanning of SARS-CoV-2 Receptor Binding Domain Reveals  
528 Constraints on Folding and ACE2 Binding. *Cell* **182**, 1295-1310.e1220,  
529 doi:<https://doi.org/10.1016/j.cell.2020.08.012> (2020).
- 530 23 Rambaut, A. *et al.* Preliminary genomic characterisation of an emergent SARS-CoV-2 lineage  
531 in the UK defined by a novel set of spike mutations. (virological.org, 2020).
- 532 24 Tegally, H. *et al.* Emergence and rapid spread of a new severe acute respiratory syndrome-  
533 related coronavirus 2 (SARS-CoV-2) lineage with multiple spike mutations in South Africa.  
534 *medRxiv*, 2020.2012.2021.20248640, doi:10.1101/2020.12.21.20248640 (2020).
- 535 25 Naveca, F. *et al.* SARS-CoV-2 reinfection by the new Variant of Concern (VOC) P.1 in Amazonas,  
536 Brazil. (virological.org, 2021).
- 537 26 Hensley, S. E. *et al.* Hemagglutinin receptor binding avidity drives influenza A virus antigenic  
538 drift. *Science* **326**, 734-736, doi:10.1126/science.1178258 (2009).
- 539 27 Juraszek, J. *et al.* Stabilizing the closed SARS-CoV-2 spike trimer. *Nature Communications* **12**,  
540 244, doi:10.1038/s41467-020-20321-x (2021).
- 541 28 Conceicao, C. *et al.* The SARS-CoV-2 Spike protein has a broad tropism for mammalian ACE2  
542 proteins. *PLoS Biol* **18**, e3001016, doi:10.1371/journal.pbio.3001016 (2020).
- 543 29 Welkers, M. R. A., Han, A. X., Reusken, C. B. E. M. & Eggink, D. Possible host-adaptation of  
544 SARS-CoV-2 due to improved ACE2 receptor binding in mink. *Virus Evolution*,  
545 doi:10.1093/ve/veaa094 (2020).
- 546 30 Meng, B. *et al.* Recurrent emergence of SARS-CoV-2 spike deletion H69/V70 and its role in the  
547 Alpha variant B.1.1.7. *Cell Reports*, 109292, doi:<https://doi.org/10.1016/j.celrep.2021.109292>  
548 (2021).
- 549 31 Garcia-Beltran, W. F. *et al.* Multiple SARS-CoV-2 variants escape neutralization by vaccine-  
550 induced humoral immunity. *Cell* **184**, 2372-2383.e2379, doi:10.1016/j.cell.2021.03.013  
551 (2021).
- 552 32 Peacock, T. P., Penrice-Randal, R., Hiscox, J. A. & Barclay, W. S. SARS-CoV-2 one year on:  
553 evidence for ongoing viral adaptation. *J Gen Virol* **102**, doi:10.1099/jgv.0.001584 (2021).
- 554 33 Motozono, C. *et al.* SARS-CoV-2 spike L452R variant evades cellular immunity and increases  
555 infectivity. *Cell Host & Microbe* **29**, 1124-1136.e1111,  
556 doi:<https://doi.org/10.1016/j.chom.2021.06.006> (2021).
- 557 34 Bayarri-Olmos, R. *et al.* The SARS-CoV-2 Y453F mink variant displays a pronounced increase in  
558 ACE-2 affinity but does not challenge antibody neutralization. *Journal of Biological Chemistry*  
559 **296**, 100536, doi:<https://doi.org/10.1016/j.jbc.2021.100536> (2021).
- 560 35 *Renewed calls for closure of Galicia mink farms after four more Covid outbreaks,*  
561 [https://spanishnewstoday.com/renewed-calls-for-closure-of-galicia-mink-farms-after-four-](https://spanishnewstoday.com/renewed-calls-for-closure-of-galicia-mink-farms-after-four-more-covid-outbreaks_1612810-a.html)  
562 [more-covid-outbreaks\\_1612810-a.html](https://spanishnewstoday.com/renewed-calls-for-closure-of-galicia-mink-farms-after-four-more-covid-outbreaks_1612810-a.html)> (2021).
- 563 36 *Poland orders cull at fur farm with country's first mink coronavirus case,*  
564 [https://notesfrompoland.com/2021/02/01/poland-orders-cull-at-fur-farm-with-countrys-](https://notesfrompoland.com/2021/02/01/poland-orders-cull-at-fur-farm-with-countrys-first-mink-coronavirus-case/)  
565 [first-mink-coronavirus-case/](https://notesfrompoland.com/2021/02/01/poland-orders-cull-at-fur-farm-with-countrys-first-mink-coronavirus-case/)> (2021).
- 566 37 Goldhill, D. H. & Barclay, W. S. 2020 hindsight - Should evolutionary virologists have expected  
567 the unexpected during a pandemic? *Evolution*, doi:10.1111/evo.14317 (2021).

- 568 38 Predecki, M. *et al.* Humoral and T-cell responses to SARS-CoV-2 vaccination in patients  
569 receiving immunosuppression. *Ann Rheum Dis*, doi:10.1136/annrheumdis-2021-220626  
570 (2021).
- 571 39 Rebendenne, A. *et al.* SARS-CoV-2 triggers an MDA-5-dependent interferon response which is  
572 unable to control replication in lung epithelial cells. *Journal of Virology*, JVI.02415-02420,  
573 doi:10.1128/jvi.02415-20 (2021).
- 574 40 Davidson, A. D. *et al.* Characterisation of the transcriptome and proteome of SARS-CoV-2  
575 reveals a cell passage induced in-frame deletion of the furin-like cleavage site from the spike  
576 glycoprotein. *Genome Med* **12**, 68, doi:10.1186/s13073-020-00763-0 (2020).
- 577 41 McKay, P. F. *et al.* Self-amplifying RNA SARS-CoV-2 lipid nanoparticle vaccine candidate  
578 induces high neutralizing antibody titers in mice. *Nat Commun* **11**, 3523, doi:10.1038/s41467-  
579 020-17409-9 (2020).
- 580 42 Brown, J. C. *et al.* Increased transmission of SARS-CoV-2 lineage B.1.1.7 (VOC 2020212/01) is  
581 not accounted for by a replicative advantage in primary airway cells or antibody escape.  
582 *bioRxiv*, 2021.2002.2024.432576, doi:10.1101/2021.02.24.432576 (2021).
- 583 43 Thi Nhu Thao, T. *et al.* Rapid reconstruction of SARS-CoV-2 using a synthetic genomics  
584 platform. *Nature* **582**, 561-565, doi:10.1038/s41586-020-2294-9 (2020).
- 585 44 Gaida, A. *et al.* Cloning of the Repertoire of Individual Plasmodium falciparum var Genes Using  
586 Transformation Associated Recombination (TAR). *PLOS ONE* **6**, e17782,  
587 doi:10.1371/journal.pone.0017782 (2011).
- 588 45 Rihn, S. J. *et al.* A plasmid DNA-launched SARS-CoV-2 reverse genetics system and coronavirus  
589 toolkit for COVID-19 research. *PLoS Biol* **19**, e3001091, doi:10.1371/journal.pbio.3001091  
590 (2021).
- 591 46 da Silva Filipe, A. *et al.* Genomic epidemiology reveals multiple introductions of SARS-CoV-2  
592 from mainland Europe into Scotland. *Nature Microbiology* **6**, 112-122, doi:10.1038/s41564-  
593 020-00838-z (2021).
- 594 47 Zhou, J. *et al.* Investigating SARS-CoV-2 surface and air contamination in an acute healthcare  
595 setting during the peak of the COVID-19 pandemic in London. *Clin Infect Dis*,  
596 doi:10.1093/cid/ciaa905 (2020).
- 597 48 Corman, V. M. *et al.* Detection of 2019 novel coronavirus (2019-nCoV) by real-time RT-PCR.  
598 *Eurosurveillance* **25**, 2000045, doi:doi:[https://doi.org/10.2807/1560-](https://doi.org/10.2807/1560-7917.ES.2020.25.3.2000045)  
599 [7917.ES.2020.25.3.2000045](https://doi.org/10.2807/1560-7917.ES.2020.25.3.2000045) (2020).
- 600 49 Flower, B. *et al.* Clinical and laboratory evaluation of SARS-CoV-2 lateral flow assays for use in  
601 a national COVID-19 seroprevalence survey. *Thorax* **75**, 1082-1088, doi:10.1136/thoraxjnl-  
602 2020-215732 (2020).
- 603 50 Moshe, M. *et al.* SARS-CoV-2 lateral flow assays for possible use in national covid-19  
604 seroprevalence surveys (React 2): diagnostic accuracy study. *BMJ* **372**, n423,  
605 doi:10.1136/bmj.n423 (2021).
- 606 51 Thakur, N. *et al.* Micro-fusion inhibition tests: quantifying antibody neutralization of virus-  
607 mediated cell-cell fusion. *Journal of General Virology* **102**,  
608 doi:<https://doi.org/10.1099/jgv.0.001506> (2021).
- 609 52 Ishikawa, H., Meng, F., Kondo, N., Iwamoto, A. & Matsuda, Z. Generation of a dual-functional  
610 split-reporter protein for monitoring membrane fusion using self-associating split GFP. *Protein*  
611 *Eng Des Sel* **25**, 813-820, doi:10.1093/protein/gzs051 (2012).
- 612 53 Dong, X. *et al.* Variation around the dominant viral genome sequence contributes to viral load  
613 and outcome in patients with Ebola virus disease. *Genome Biology* **21**, 238,  
614 doi:10.1186/s13059-020-02148-3 (2020).
- 615 54 Wu, F. *et al.* A new coronavirus associated with human respiratory disease in China. *Nature*  
616 **579**, 265-269, doi:10.1038/s41586-020-2008-3 (2020).

617 55 Katoh, K. & Standley, D. M. MAFFT multiple sequence alignment software version 7:  
618 improvements in performance and usability. *Mol Biol Evol* **30**, 772-780,  
619 doi:10.1093/molbev/mst010 (2013).  
620 56 Rambaut, A. *et al.* A dynamic nomenclature proposal for SARS-CoV-2 lineages to assist  
621 genomic epidemiology. *Nat Microbiol* **5**, 1403-1407, doi:10.1038/s41564-020-0770-5 (2020).  
622 57 O'Toole, Á. *et al.* Assignment of epidemiological lineages in an emerging pandemic using the  
623 pangolin tool. *Virus Evolution*, doi:10.1093/ve/veab064 (2021).  
624 58 Stamatakis, A. RAxML version 8: a tool for phylogenetic analysis and post-analysis of large  
625 phylogenies. *Bioinformatics* **30**, 1312-1313, doi:10.1093/bioinformatics/btu033 (2014).  
626 59 Yu, G., Smith, D. K., Zhu, H., Guan, Y. & Lam, T. T.-Y. ggtree: an r package for visualization and  
627 annotation of phylogenetic trees with their covariates and other associated data. *Methods in*  
628 *Ecology and Evolution* **8**, 28-36, doi:<https://doi.org/10.1111/2041-210X.12628> (2017).  
629 60 Benton, D. J. *et al.* Receptor binding and priming of the spike protein of SARS-CoV-2 for  
630 membrane fusion. *Nature*, doi:10.1038/s41586-020-2772-0 (2020).  
631

## 632 **Figure legends**

633 **Figure 1. Passage of SARS-CoV-2 in ferrets results in spontaneous emergence of the mink-associated**  
634 **mutations Y453F and N501T.**

635 A) Ferret transmission chains from a previous study were deep sequenced to investigate any  
636 changes that occurred during infection and transmission of ferrets. Grey lines indicate previously  
637 described RNA shedding patterns seen in each ferret – pie charts indicate RBD mutations seen at each  
638 time point (as determined by deep sequencing) indicated by a black arrow.

639 B) Maximum-likelihood phylogeny of SARS-CoV-2 genomes sampled from American mink  
640 (*Neogale vison*, formerly *Neovison vison*), highlighting the spike mutations del69-70, Y453F, F486L or  
641 F486I, N501T, and D614G. Tip nodes are shown as points coloured by sampling location, according to  
642 the colour key. Columns to the right show the presence of either the wild-type amino acid(s) (light  
643 grey) or the mutations annotated above (coloured bars). Major epidemiological lineages designated  
644 with the Pango nomenclature system are labelled. Black arrow indicates the branch that constitutes  
645 the Danish mink strain known as cluster 5. At position 486, mutant viruses possessed 486L (leucine)  
646 except for a monophyletic clade formed of 20 sequences sampled in Latvia that possessed 486I  
647 (isoleucine) that are marked by a white asterisk.

648 **Figure 2. The spike mutation, Y453F, enhances replication and morbidity in ferrets.**

649 A) Deep sequencing of RBD mutations of SARS-CoV-2 from ferret passage 2 swab (see Figure  
650 1a) before and after isolation in Vero cells.

651 RNA (B) and infectious virus (C) shedding dynamics of ferrets directly infected with either WT  
652 (orange circles; as previously described in <sup>3</sup>) or Y453F (ie ferret passage 2; black and white squares)  
653 SARS-CoV-2. N=4 naïve ferrets in each group were infected with 10<sup>5</sup> p.f.u. of either virus. Percentage  
654 weight loss (D) and change in body temperature (E) were recorded daily. Statistics on B and C  
655 determined by multiple Mann-Whitney tests. \*0.05 ≥ *P*

656 Spike RBD (F) and non-RBD (G) mutations seen in Vero grown ferret passage 2 virus (time 0)  
657 from Figure 2A-D and dynamics over time in directly infected ferrets.

658 **Figure 3. Mink- and ferret-associated spike mutations allow more efficient entry into cells**  
659 **expressing the ferret ACE2 receptor.**

660 A) Pseudovirus entry in human or ferret ACE2 expressing cells. Mutant SARS-CoV-2 spike-  
661 containing pseudovirus entry into HEK 293Ts expressing human or ferret ACE2 or empty vector. Entry  
662 normalised to signals from human ACE2 expressing cells. Each data point indicates mean value taken  
663 from a completely independent repeat (N≥3). Statistics were determined by comparing log-  
664 transformed values of ferret ACE2 entry using a one-way ANOVA with multiple comparisons against  
665 the WT. \*0.05 ≥ *P* > 0.01; \*\*0.01 ≥ *P* > 0.001; \*\*\*0.001 ≥ *P* > 0.0001; \*\*\*\**P* ≤ 0.0001.

666 Entry of SARS-CoV-2 spike mutant-expressing lentiviral pseudotypes into BHK-21 cells  
667 expressing different mammalian ACE2 proteins. Pseudovirus shown contain either D614G (B) or D614  
668 (C). Entry normalised to entry into human ACE2 expressing cells. Representative repeat shown from  
669 N≥3 repeats.



670 D) Structure of ACE2/Spike RBD interface showing key mink-adaption residues and nearby  
671 residues that differ in mustelid and human ACE2. Figure made using PyMOL (Schrödinger) and PDB:  
672 7A94<sup>60</sup>.

673

674 **Figure 4. The common mink and ferret adaptation, Y453F, attenuates virus replication in primary**  
675 **human airway cells.**

676 Human primary airway epithelial cells cultured at air-liquid interface were infected at an MOI  
677 of approximately 0.1 with A) a mixture of parental and ferret-adapted England/2 virus B) A mixture of  
678 Mink-adapted 'Cluster 5' virus and a D614G control or C) either isogenic WT (D614G) or D614G + Y453F  
679 -containing reverse genetics-derived virus isolates. Virus titres were measured by TCID<sub>50</sub> (C) E gene  
680 qPCR (A, B). Statistics for competition assays were determined by One-Way ANOVA with multiple  
681 comparisons against time 0. Statistics for the head-to-head growth curve (C) were determined by  
682 multiple unpaired T-tests on log-transformed data. All infections were performed on triplicate wells  
683 from matched donors (N = 3). \*0.05 ≥ P > 0.01; \*\*P ≤ 0.01.

684 **Figure 5. Mink and ferret associated mutations have a minimal impact on SARS-CoV-2 antigenicity.**

685 Live virus neutralisation comparing WT or Y453F-containing ferret passage 2 (A) or the isogenic  
686 reverse genetics-derived WT (D614G) and D614G + Y453F-containing SARS-CoV-2 isolates (B) using  
687 N=6 human convalescent antisera from the first UK wave (~April-June 2020; A) or N=10 double-dose  
688 BNT162b2 (Pfizer-BioNTech mRNA vaccine) human antisera (B). Fold differences annotated on graph  
689 indicate differences in geometric means of NT<sub>50</sub>. Statistics were determined by two-tailed Wilcoxon  
690 test with matched pairs. \*0.05 ≥ P

691 C) Pseudovirus neutralisation of different mink-adaptations containing mutants using N=8  
692 human convalescent antisera from the first UK wave (~April-June 2020). Fold differences annotated

693 on graph indicate differences in geometric means of NT<sub>50</sub>. Statistics determined by matched pair  
694 Friedman non-parametric test with multiple comparisons against WT. \*0.05 ≥ *P*.

695 **Figure 6. Several variants of concern show enhanced entry into ferret ACE2 expressing cells.**

696 A) Mutant SARS-CoV-2 spike-containing pseudovirus entry into HEK 293Ts expressing human  
697 or ferret ACE2, or empty vector. Entry normalised to signals from human ACE2 expressing cells. Each  
698 data point indicates data from a completely independent repeat (N≥3). Statistics were determined by  
699 comparing log-transformed values of ferret ACE2 entry using a one-way ANOVA with multiple  
700 comparisons against the WT. \*0.05 ≥ *P* > 0.01; \*\*0.01 ≥ *P* > 0.001; \*\*\*0.001 ≥ *P* > 0.0001;  
701 \*\*\*\**P* ≤ 0.0001. RBD mutational profile of the different spike proteins is shown below. Cells in orange  
702 indicate changes from WT/D614G. Alpha also known as B.1.1.7; Beta also known as B.1.351; Gamma  
703 also known as P.1; Eta also known as B.1.525; Iota also known as B.1.526+E484K.

704 **Extended data Figure legends**

705 **Extended data Figure 1. Amino acid differences between ferret and mink ACE2.**

706 Differences between ferret and mink ACE2 are shown on the structure of human ACE/Spike  
707 structure PDB: 7A94<sup>60</sup>.

708 **Extended data Figure 2. Extended data from Figure 3**

709 A) Non-normalised data from Figure 3B.

710 B) Non-normalised data from extended data Figure 3C.

711 C, D) Cell-cell fusion assays of HEK 293Ts with rLUC-GFP1-7 transfected with the stated Spike  
712 protein and BHK-21 cells expressing the named ACE2 and rLUC-GFP 8-11. Luminescence values shown  
713 normalised to human ACE2 (C) or as raw values (D).

Figure 1. Passage of SARS-CoV-2 in ferrets results in spontaneous emergence of the mink-associated mutations Y453F and N501T.

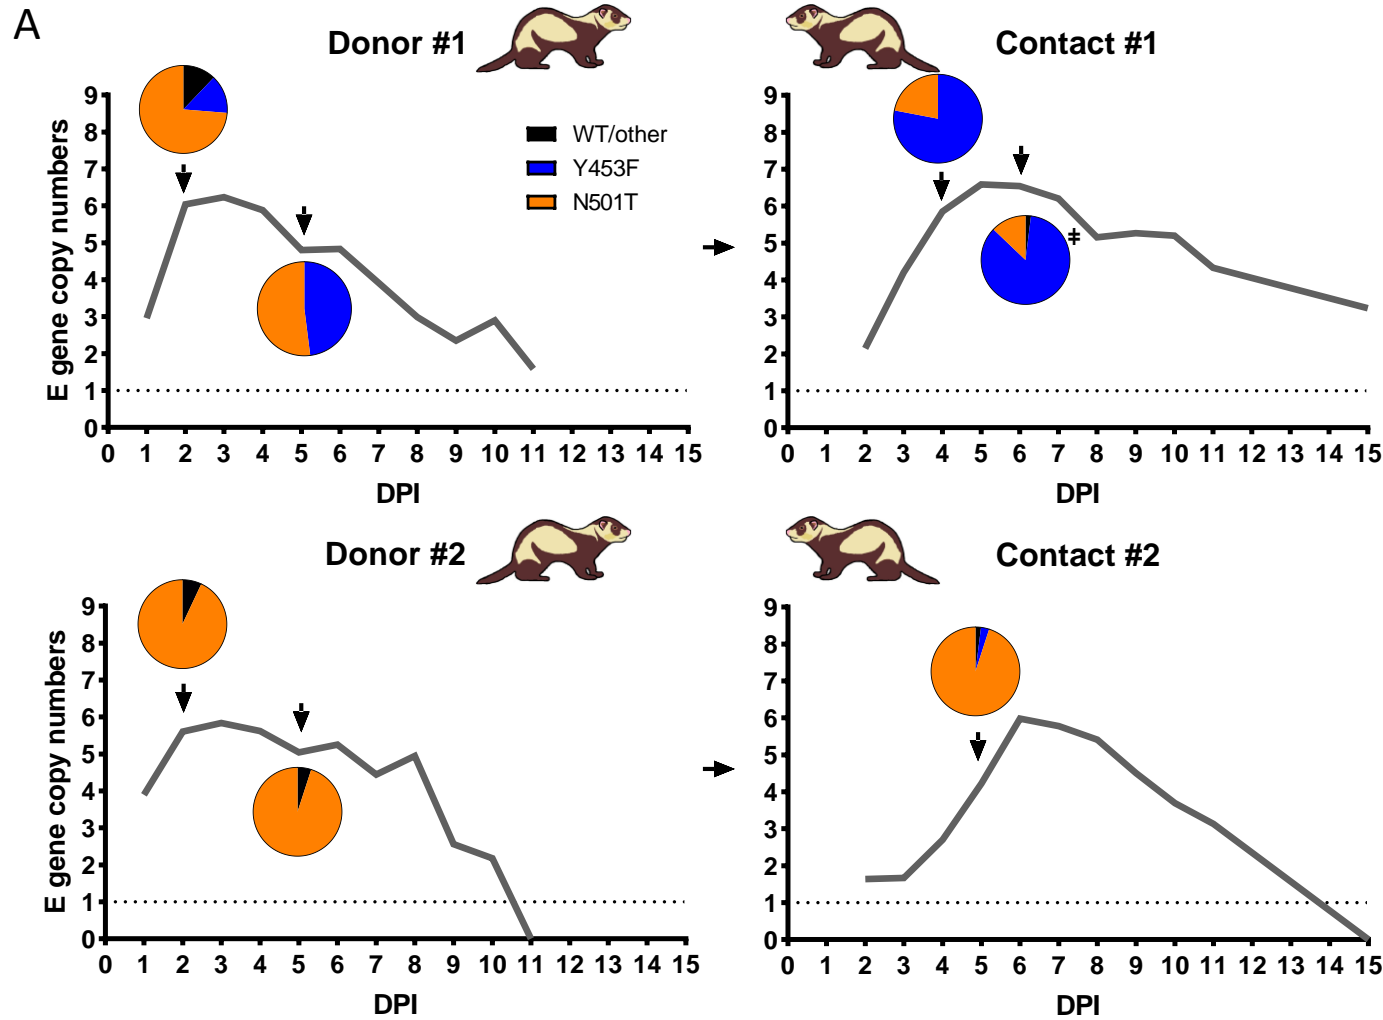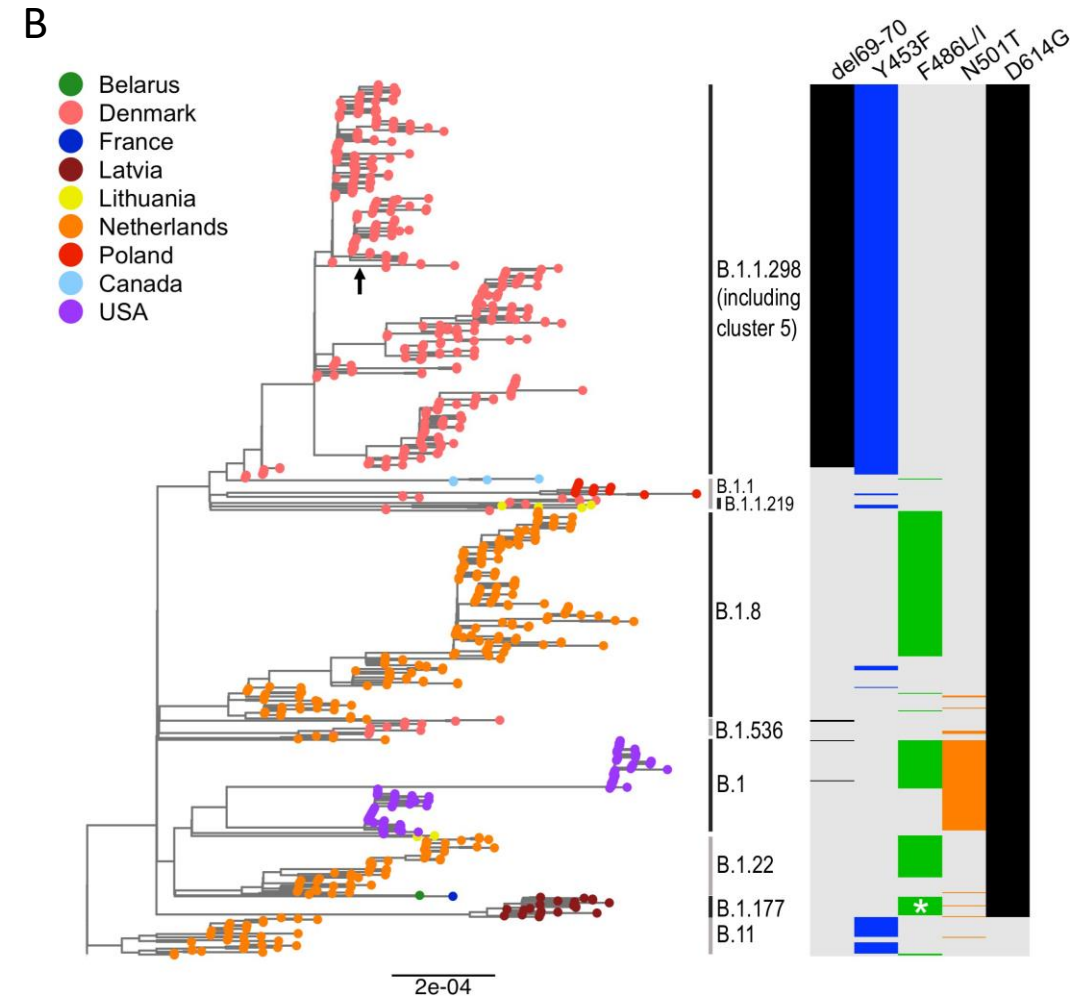

Figure 2. The spike mutation, Y453F, enhances replication and morbidity in ferrets.

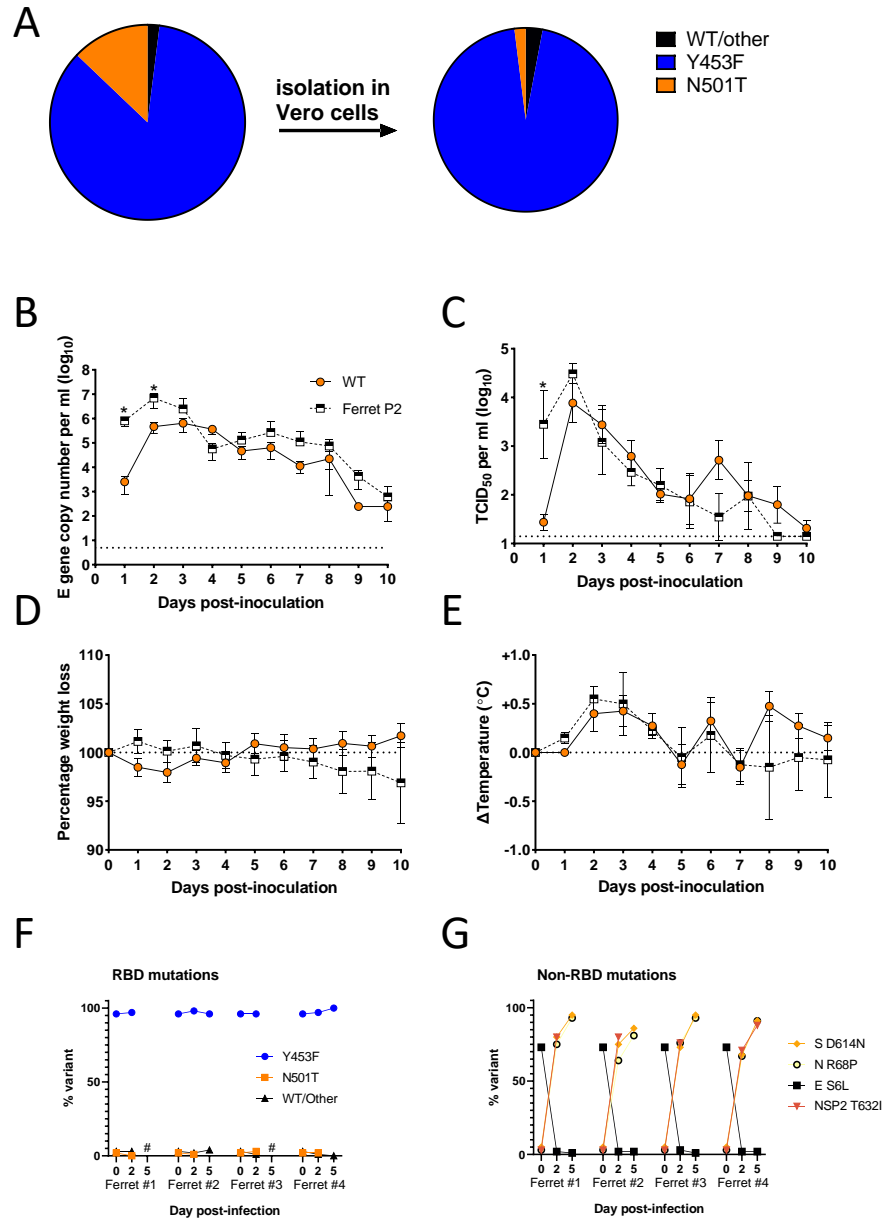

Figure 3. Mink- and ferret-associated spike mutations allow more efficient entry into cells expressing the ferret ACE2 receptor.

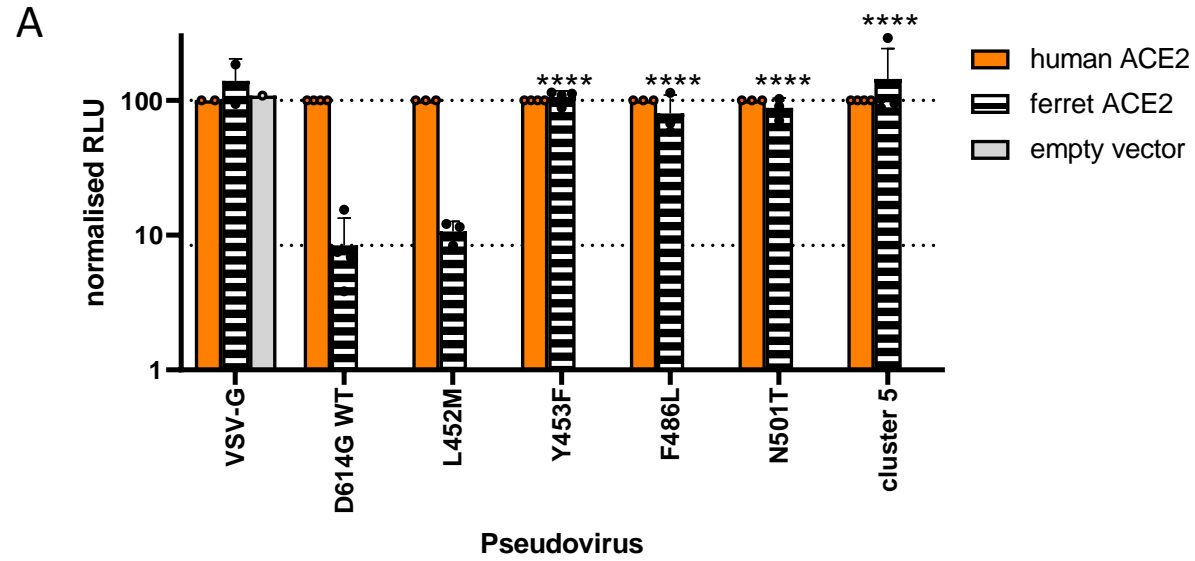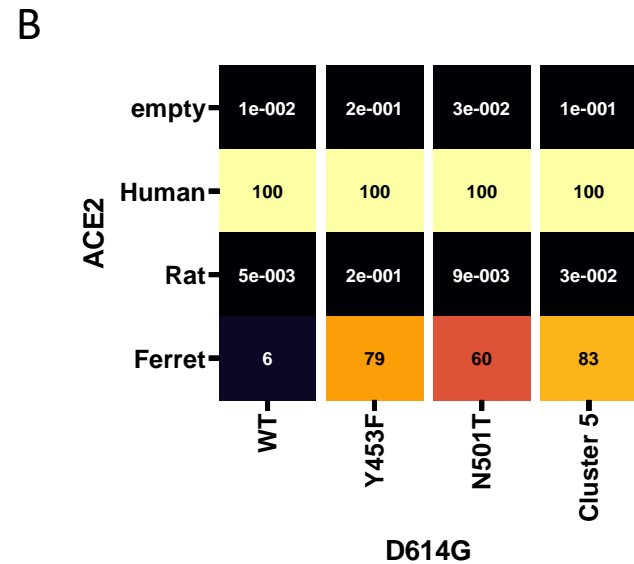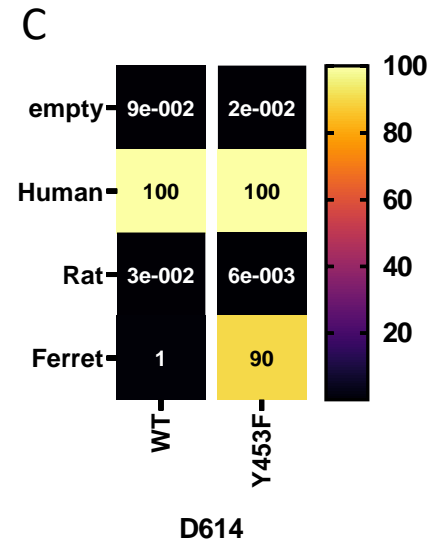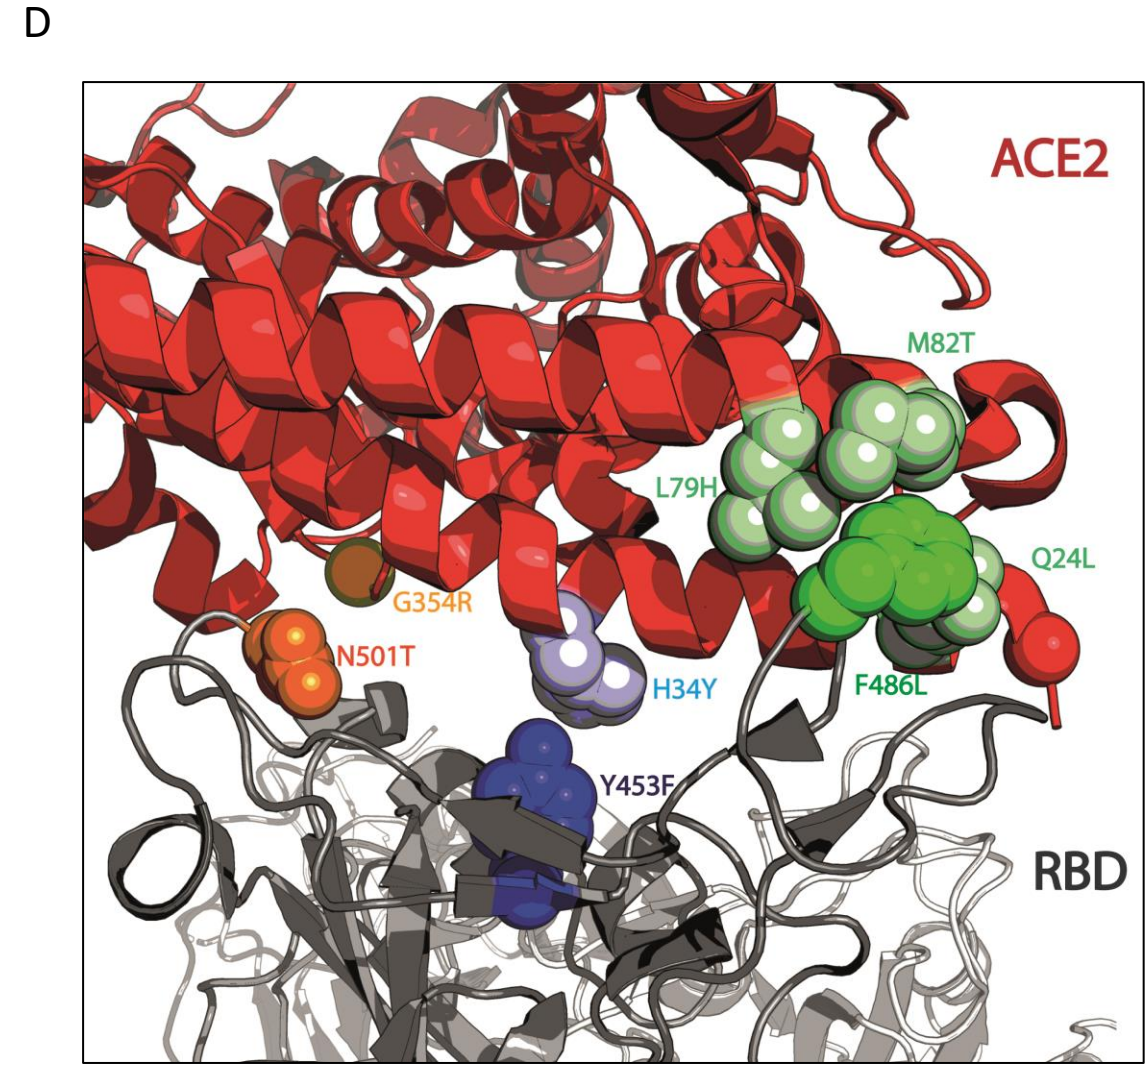

Figure 4. The common mink and ferret adaptation, Y453F, attenuates virus replication in primary human airway cells.

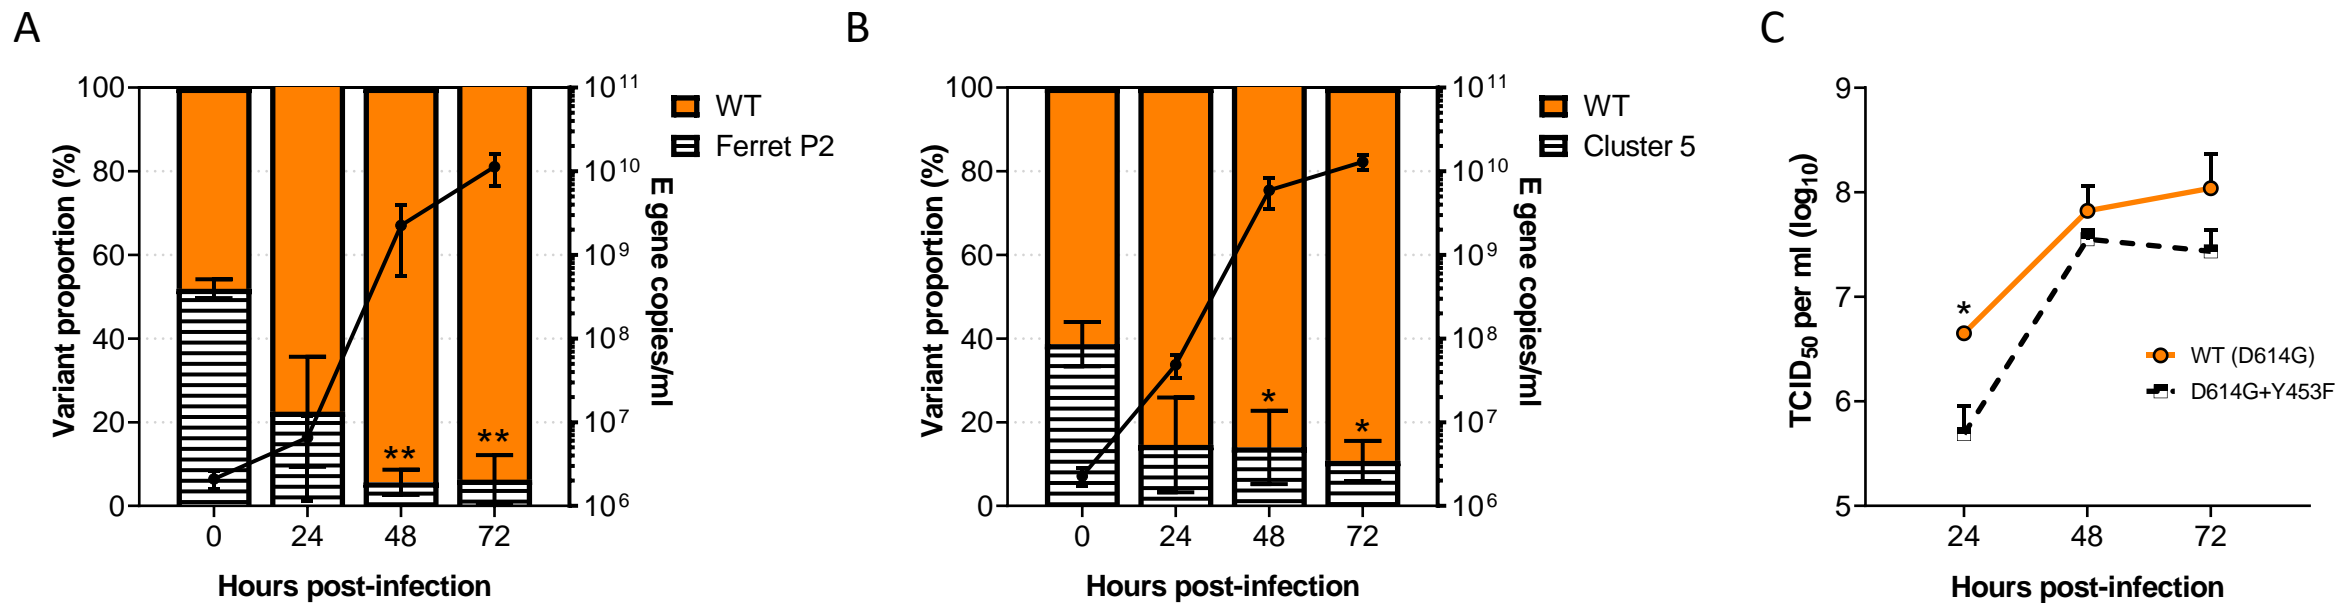

Figure 5. Mink and ferret associated mutations have a minimal impact on SARS-CoV-2 antigenicity

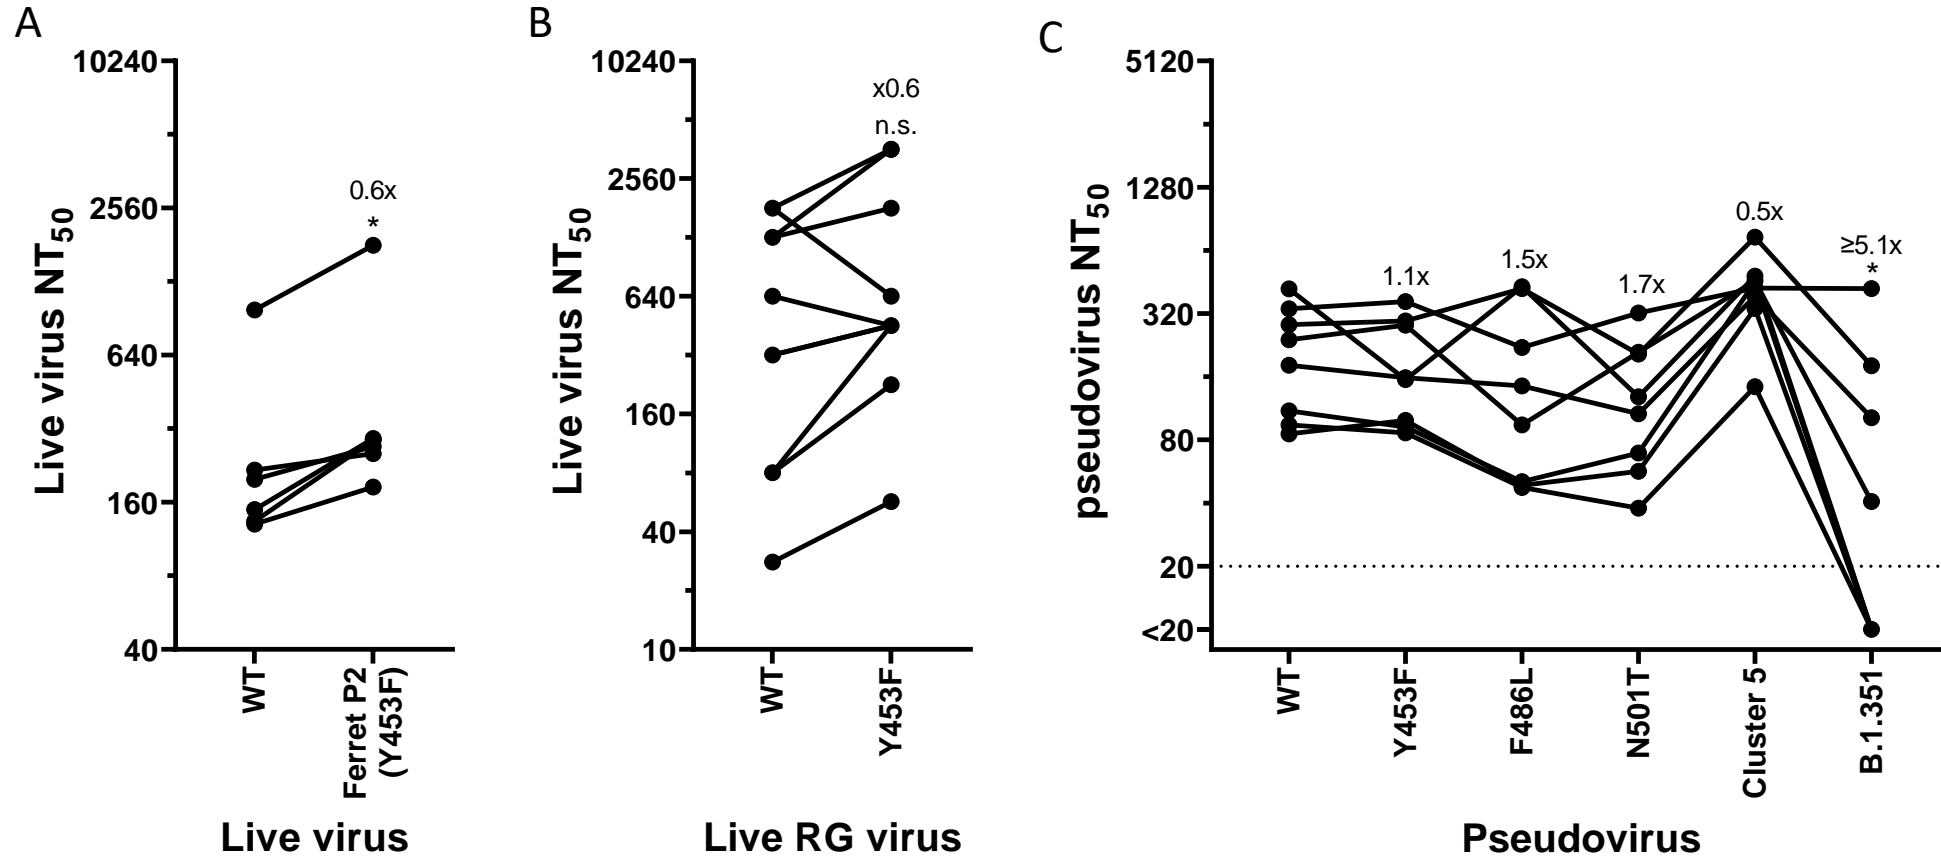

Figure 6. Several variants of concern show enhanced entry into ferret ACE2 expressing cells

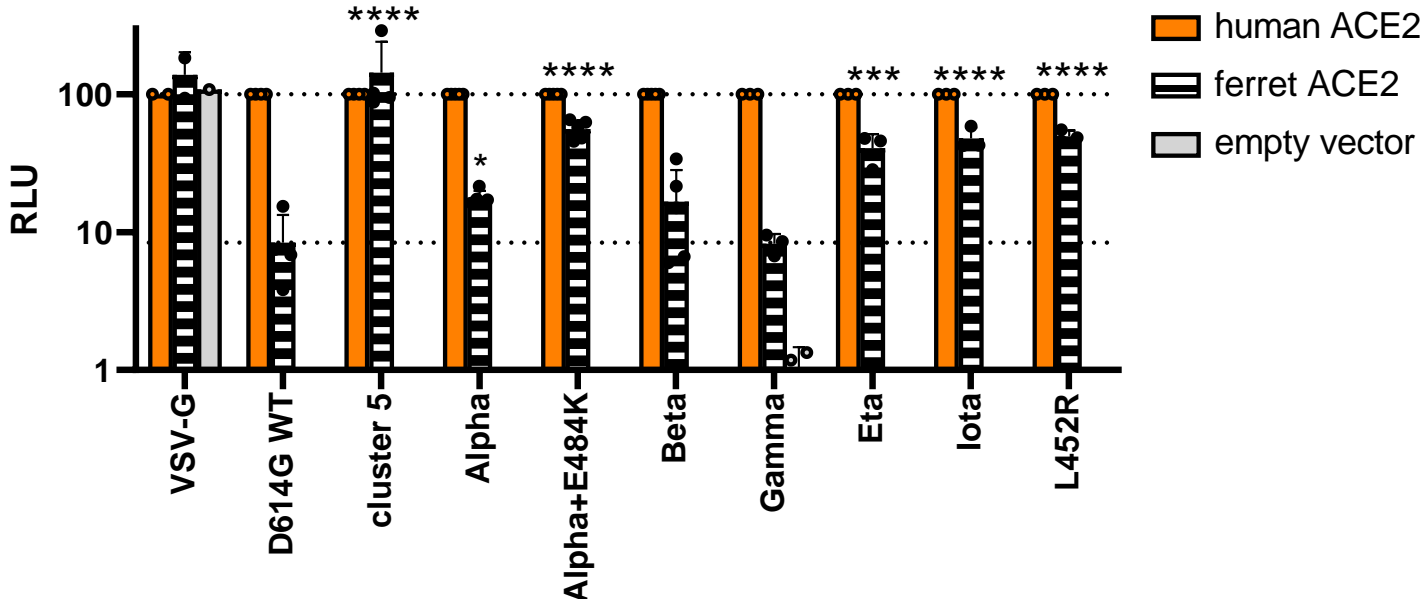

| RBD position | 417 | 452 | 453 | 484 | 501 | 614 |
|--------------|-----|-----|-----|-----|-----|-----|
| K            | .   | .   | .   | N   | T   | .   |
| L            | .   | .   | .   | .   | .   | R   |
| Y            | F   | .   | .   | .   | .   | .   |
| E            | .   | .   | K   | K   | K   | K   |
| N            | .   | Y   | Y   | Y   | Y   | .   |
| G            | .   | .   | .   | .   | .   | .   |



Extended data Figure 1.

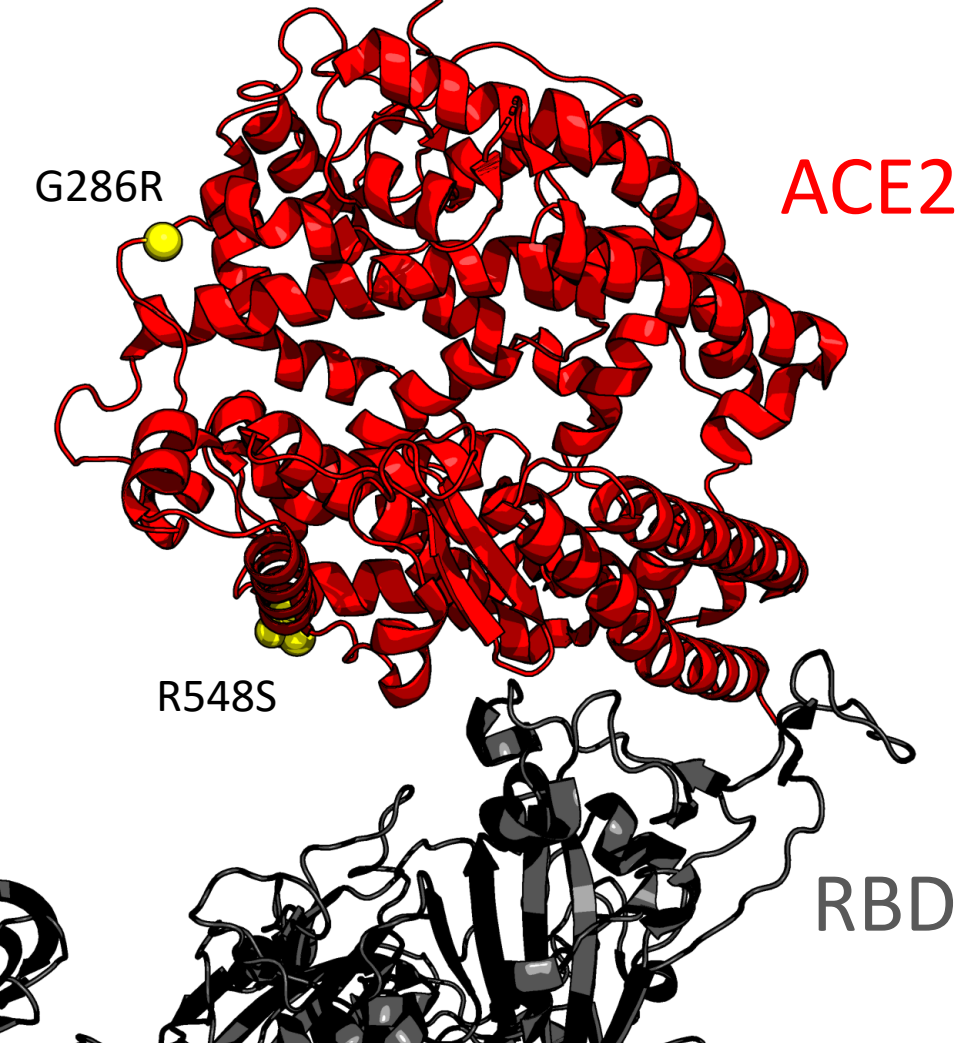

Extended data Figure 2. Extended data from Figure 3

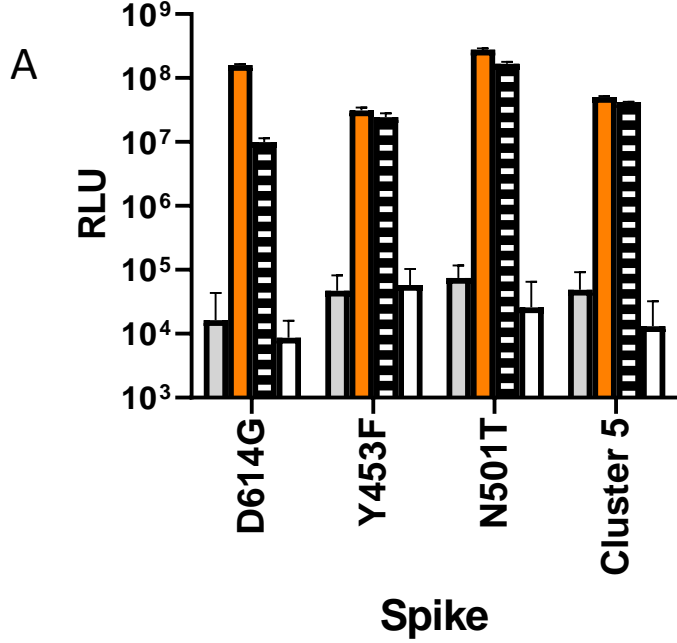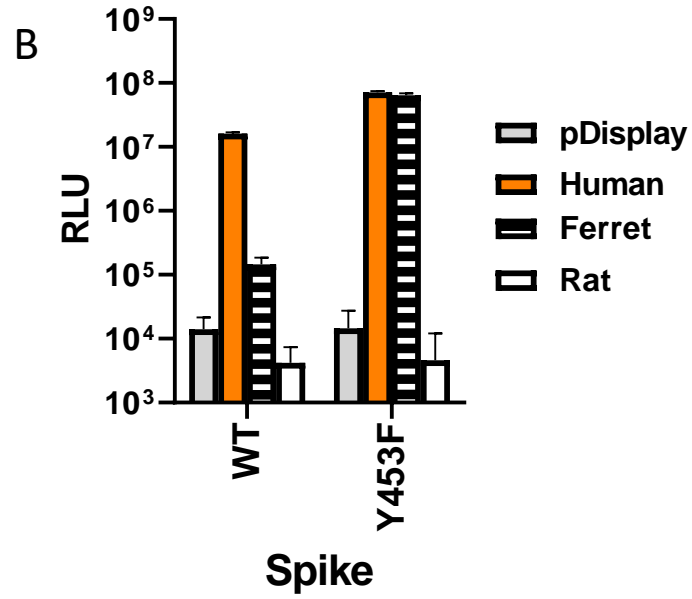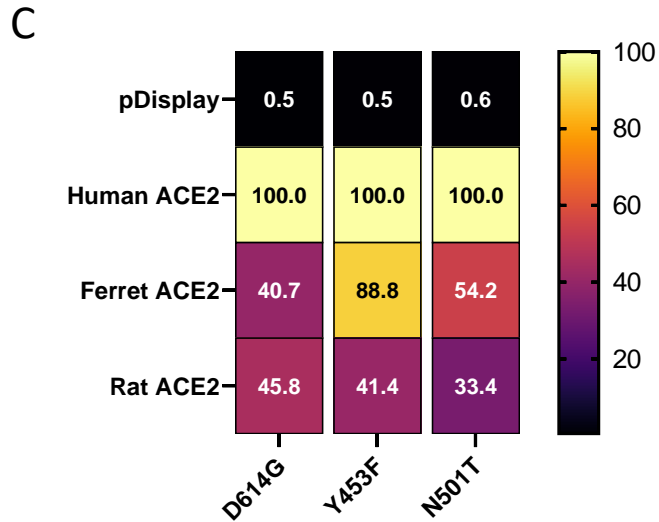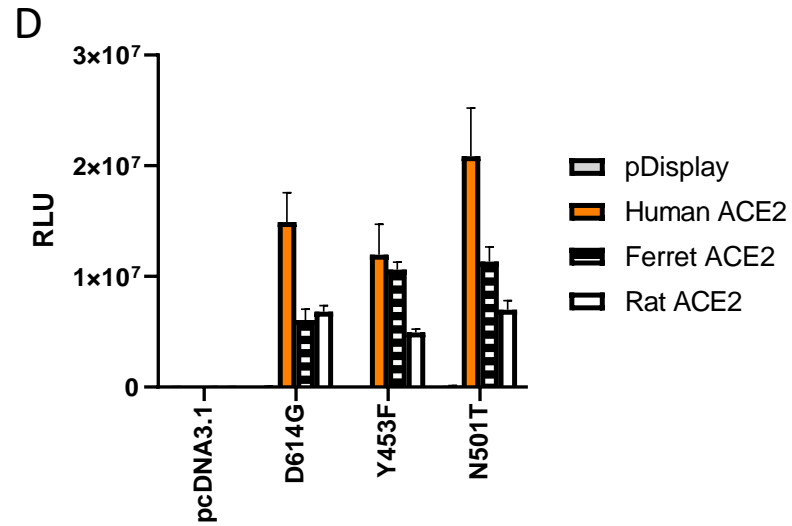

Source: https://www.biorxiv.org/content/10.1101/2021.08.20.456972v1.full.pdf
